# Supplementary material for: Simulation of the cyclic voltammetric response of an outer-sphere redox species with inclusion of electrical double layer structure and ohmic potential drop
Source: Royal Society of Chemistry journal article supplement (doi:10.1039/d3cp00098b), 2023-01-01

# COMSOL Model Report A – Electrostatic Model of a Soluble Redox Couple

|             |                          |
|-------------|--------------------------|
| Report date | Dec 14, 2022 11:42:14 AM |
|-------------|--------------------------|

# Contents

|                                                                  |           |
|------------------------------------------------------------------|-----------|
| <b>1. Global Definitions</b> .....                               | <b>3</b>  |
| 1.1. Parameters.....                                             | 3         |
| <b>2. Component 1</b> .....                                      | <b>7</b>  |
| 2.1. Definitions.....                                            | 7         |
| 2.2. Geometry 1.....                                             | 10        |
| 2.3. Supporting Electrolyte - Transport of Diluted Species.....  | 11        |
| 2.4. Soluble Redox Species - Transport of Diluted Species 2..... | 16        |
| 2.5. Electrostatics.....                                         | 22        |
| 2.6. Mesh 1.....                                                 | 32        |
| <b>3. Study 1</b> .....                                          | <b>36</b> |
| 3.1. Parametric Sweep.....                                       | 36        |
| 3.2. Stationary.....                                             | 36        |
| 3.3. Time Dependent.....                                         | 37        |
| 3.4. Solver Configurations.....                                  | 37        |
| <b>4. Results</b> .....                                          | <b>43</b> |
| 4.1. Plot Groups.....                                            | 43        |

# 1 Global Definitions

|      |                        |
|------|------------------------|
| Date | Dec 7, 2022 2:31:44 PM |
|------|------------------------|

## GLOBAL SETTINGS

|         |                                      |
|---------|--------------------------------------|
| Version | COMSOL Multiphysics 5.6 (Build: 280) |
|---------|--------------------------------------|

## USED PRODUCTS

|                                      |
|--------------------------------------|
| COMSOL Multiphysics                  |
| Chemical Reaction Engineering Module |

## COMPUTER INFORMATION

|                  |                                                |
|------------------|------------------------------------------------|
| CPU              | Intel64 Family 6 Model 158 Stepping 9, 4 cores |
| Operating system | Windows 10                                     |

## 1.1 PARAMETERS

### 1.1.1 General System & Geometry

#### GENERAL SYSTEM & GEOMETRY

| Name      | Expression                                 | Value                                | Description                                                                                  |
|-----------|--------------------------------------------|--------------------------------------|----------------------------------------------------------------------------------------------|
| epsilon_s | 80                                         | 80                                   | The relative dielectric constant of bulk water, assuming $T = 293\text{K}$                   |
| cAnion_b  | $c\text{NO3b} + c\text{CounterIon0}$       | $1003 \text{ mol/m}^3$               | Bulk anion concentration of supporting electrolyte including counter ion of the redox couple |
| cCation_b | $c\text{Kb}$                               | $1000 \text{ mol/m}^3$               | Bulk cation concentration of supporting electrolyte                                          |
| cKb       | $1[\text{M}]$                              | $1000 \text{ mol/m}^3$               |                                                                                              |
| cNO3b     | $c\text{Kb}$                               | $1000 \text{ mol/m}^3$               |                                                                                              |
| D_K       | $2.0 \cdot 10^{-5} [\text{cm}^2/\text{s}]$ | $2\text{E}-9 \text{ m}^2/\text{s}$   | Diffusion coefficient for $\text{K}^+ = 1.957$                                               |
| D_NO3     | $1.9 \cdot 10^{-5} [\text{cm}^2/\text{s}]$ | $1.9\text{E}-9 \text{ m}^2/\text{s}$ | Diffusion coefficient for $\text{ClO}_4^- = 1.902$                                           |

| Name        | Expression                                                                                                                                                                                 | Value                    | Description                                               |
|-------------|--------------------------------------------------------------------------------------------------------------------------------------------------------------------------------------------|--------------------------|-----------------------------------------------------------|
| D_Anion     | D_NO3                                                                                                                                                                                      | 1.9E-9 m <sup>2</sup> /s |                                                           |
| D_Cation    | D_K                                                                                                                                                                                        | 2E-9 m <sup>2</sup> /s   |                                                           |
| L           | 0.25[cm]                                                                                                                                                                                   | 0.0025 m                 | Length of domain/boundary                                 |
| z_Anion     | -1                                                                                                                                                                                         | -1                       | The electrostatic charge of supporting electrolyte anion  |
| z_Cation    | +1                                                                                                                                                                                         | 1                        | The electrostatic charge of supporting electrolyte cation |
| F_RT        | (F_const)/(R_const*T)                                                                                                                                                                      | 39.586 1/V               | Temperature                                               |
| T           | 293.15[K]                                                                                                                                                                                  | 293.15 K                 |                                                           |
| Kappa       | $e\_const * \sqrt{((cKb * (z\_Cation^2) + cNO3b * (z\_Anion^2) + (cOx0\_dif * (z\_Ox\_diff^2)) * N\_A\_const) / (\epsilon_{n\_s} * \epsilon_{n\_s} * \epsilon_{n\_s} * k\_B\_const * T))}$ | 3.2913E9 1/m             | Reciprocal of Debye length                                |
| DebyeLength | 1/Kappa                                                                                                                                                                                    | 3.0383E-10 m             | Debye length                                              |

## 1.1.2 Compact Layers

### COMPACT LAYERS

| Name      | Expression               | Value                    | Description                                |
|-----------|--------------------------|--------------------------|--------------------------------------------|
| epsilon_1 | 6                        | 6                        | Dielectric constant of inner compact layer |
| epsilon_2 | 30                       | 30                       | Dielectric constant of outer compact layer |
| d1        | 0.59 [nm]                | 5.9E-10 m                | Distance from the electrode of OHP         |
| d2        | 0.29 [nm]                | 2.9E-10 m                | Distance from the electrode of IHP         |
| A         | (1[mm]) <sup>2</sup> *pi | 3.1416E-6 m <sup>2</sup> | Area of electrode (d = 2 mm)               |

## 1.1.3 Soluble Redox Species

### SOLUBLE REDOX SPECIES

| Name     | Expression                                | Value                       | Description                            |
|----------|-------------------------------------------|-----------------------------|----------------------------------------|
| DcOx     | 7.5*10 <sup>-6</sup> [cm <sup>2</sup> /s] | 7.5E-10 m <sup>2</sup> /s   | Diffusion Coefficient Oxidised species |
| DcRed    | DcOx/0.72                                 | 1.0417E-9 m <sup>2</sup> /s | Diffusion Coefficient reduced species  |
| cOx0_dif | 1 [mM]                                    | 1 mol/m <sup>3</sup>        | Initial concentration of Ox species    |
| k0_Dif   | 13.5 [cm/s]                               | 0.135 m/s                   | Rate constant (fast)                   |

| Name         | Expression                                   | Value                | Description                                                                                        |
|--------------|----------------------------------------------|----------------------|----------------------------------------------------------------------------------------------------|
| alpha_Dif    | 0.45                                         | 0.45                 | Transfer coefficient                                                                               |
| n_Dif        | $z_{\text{Ox\_diff}} - z_{\text{Red\_diff}}$ | 1                    | Number of electrons transferred                                                                    |
| E0_Dif       | -0.173 [V]                                   | -0.173 V             | Standard redox potential for $[\text{Ru}(\text{NH}_3)_6]^{3+/2+}$ Vs Ag/AgCl                       |
| z_Red_diff   | +2                                           | 2                    | Electrostatic charge of reduced species                                                            |
| z_Ox_diff    | +3                                           | 3                    | Electrostatic charge of oxidised species                                                           |
| cCounterIon0 | $c_{\text{Ox0\_dif}} \cdot 3$                | 3 mol/m <sup>3</sup> | Concentration of counter ions to the redox couple which is added to the concentration of the anion |
| n            | 1                                            | 1                    | Number of electrons transferred                                                                    |

### 1.1.4 CV Waveform

#### CV WAVEFORM

| Name             | Expression                               | Value  | Description                                                                 |
|------------------|------------------------------------------|--------|-----------------------------------------------------------------------------|
| v                | 1 [V/s]                                  | 1 V/s  | Scan rate                                                                   |
| E_Start          | 0 [V]                                    | 0 V    | Starting potential applied to the working electrode                         |
| E_High           | 0.1 [V]                                  | 0.1 V  | Switching potential, the highest potential applied to the working electrode |
| E_Low            | -0.5 [V]                                 | -0.5 V | Switching potential, the lowest potential applied to the working electrode  |
| Start_Duration   | $(E_{\text{High}} - E_{\text{Start}})/v$ | 0.1 s  | Starting scan duration                                                      |
| Segment_Duration | ScanRange/v                              | 0.6 s  | Length of one sweep                                                         |

| Name          | Expression                                                                                                                                                                  | Value   | Description                                                                                 |
|---------------|-----------------------------------------------------------------------------------------------------------------------------------------------------------------------------|---------|---------------------------------------------------------------------------------------------|
| ScanRange     | $\text{abs}(E_{\text{High}} - E_{\text{Low}})$                                                                                                                              | 0.6 V   | Absolute scan range                                                                         |
| sampling      | 1 [mV]                                                                                                                                                                      | 0.001 V | Potential step size of the CV                                                               |
| sampling_time | $(2 * \text{Segment\_Duration} + \text{Start\_Duration}) / (((\text{abs}(E_{\text{High}} - E_{\text{Low}}) * 2 + (E_{\text{High}} - E_{\text{Start}})) / \text{sampling}))$ | 0.001 s | Corresponding sampling time interval for the potential step size at the specified scan rate |

## 2 Component 1

### SETTINGS

| Description | Value                      |
|-------------|----------------------------|
| Unit system | Same as global system (SI) |

## 2.1 DEFINITIONS

### 2.1.1 Variables

#### Butler-Volmer kinetics

##### SELECTION

|                        |                                         |
|------------------------|-----------------------------------------|
| Geometric entity level | Boundary                                |
| Selection              | Geometry geom1: Dimension 0: Boundary 3 |

| Name    | Expression                                                                              | Unit | Description |
|---------|-----------------------------------------------------------------------------------------|------|-------------|
| kf_Dif  | $k0\_Dif * \exp((-alpha\_Dif * F\_RT * (Potential(t) - E0\_Dif - Phi\_PET)))$           | m/s  |             |
| kb_Dif  | $k0\_Dif * \exp(((1 - alpha\_Dif) * F\_RT * (Potential(t) - root.E0\_Dif - Phi\_PET)))$ | m/s  |             |
| Phi_PET | Phi                                                                                     | V    |             |

### 2.1.2 Functions

#### Potential waveform function

|               |           |
|---------------|-----------|
| Function name | Potential |
| Function type | Piecewise |

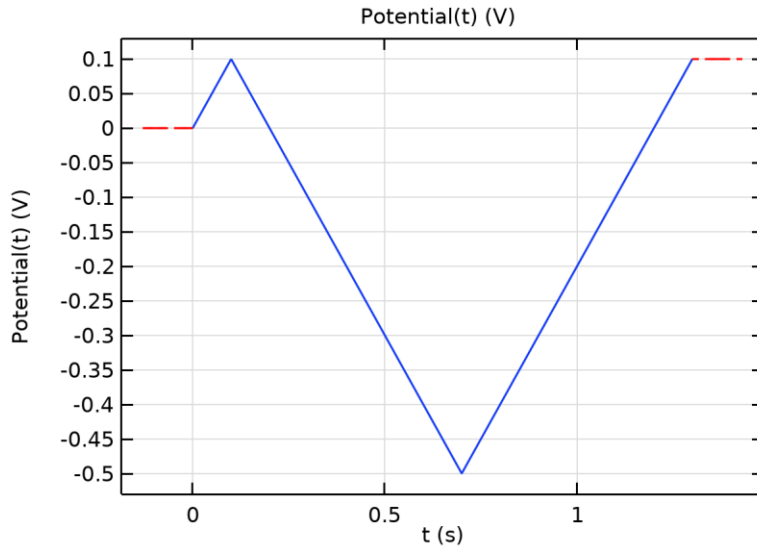

*Potential waveform function*

**DEFINITION**

| Description   | Value        |
|---------------|--------------|
| Argument      | t            |
| Extrapolation | Constant     |
| Smoothing     | No smoothing |

**DEFINITION**

| Start                           | End                               | Function                                          |
|---------------------------------|-----------------------------------|---------------------------------------------------|
| 0                               | Start_Duration                    | $E_{Start}+v*t$                                   |
| Start_Duration                  | Start_Duration+Segment_Duration   | $E_{High}-v*(t-Start\_Duration)$                  |
| Start_Duration+Segment_Duration | Start_Duration+2*Segment_Duration | $E_{Low}+v*(t-Segment\_Duration-Start\_Duration)$ |

**UNITS**

| Description | Value |
|-------------|-------|
| Arguments   | s     |
| Function    | V     |

**2.1.3 Probes**

**Total Current Probe**

|            |             |
|------------|-------------|
| Probe type | Point probe |
|------------|-------------|

**SELECTION**



|                        |                                         |
|------------------------|-----------------------------------------|
| Geometric entity level | Boundary                                |
| Selection              | Geometry geom1: Dimension 0: Boundary 3 |

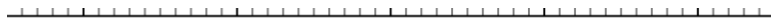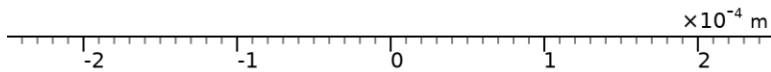

Selection

#### PROBE TYPE

| Description | Value    |
|-------------|----------|
| Type        | Integral |

#### EXPRESSION

| Description         | Value                                                                               |
|---------------------|-------------------------------------------------------------------------------------|
| Expression          | $-(\text{tds2.ntflux\_cOx\_dif}) * F\_const * \text{root.n\_Dif}$                   |
| Table and plot unit | A/m <sup>2</sup>                                                                    |
| Description         | $-(\text{tds2.ntflux\_cOx\_dif}) * F\_const * \text{root.n\_Dif}$ Normal total flux |

#### TABLE AND WINDOW SETTINGS

| Description  | Value         |
|--------------|---------------|
| Output table | Probe Table 8 |
| Plot window  | Probe Plot 2  |

## 2.1.4 Nonlocal Couplings

### Integration 1

|               |             |
|---------------|-------------|
| Coupling type | Integration |
| Operator name | intop1      |

#### SELECTION

|                        |                                         |
|------------------------|-----------------------------------------|
| Geometric entity level | Boundary                                |
| Selection              | Geometry geom1: Dimension 0: Boundary 1 |

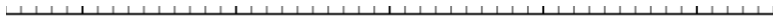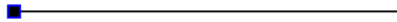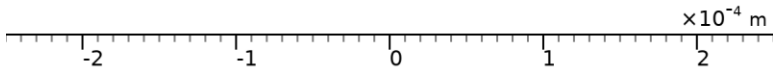

*Selection*

## 2.2 GEOMETRY 1

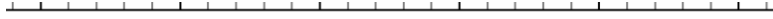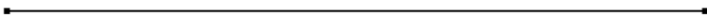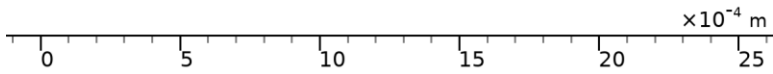

*Geometry 1*

### UNITS

|              |     |
|--------------|-----|
| Length unit  | m   |
| Angular unit | deg |

### GEOMETRY STATISTICS

| Description          | Value |
|----------------------|-------|
| Space dimension      | 1     |
| Number of domains    | 3     |
| Number of boundaries | 4     |

### 2.2.1 Interval 1 (i1)

INTERVAL

| Coordinates (m) |
|-----------------|
| 0               |
| L               |

### 2.2.2 OHP (pt1)

POINT

| Description      | Value |
|------------------|-------|
| Point coordinate | d2    |

### 2.2.3 IHP (pt2)

POINT

| Description      | Value |
|------------------|-------|
| Point coordinate | d1    |

## 2.3 SUPPORTING ELECTROLYTE - TRANSPORT OF DILUTED SPECIES

USED PRODUCTS

|                                      |
|--------------------------------------|
| COMSOL Multiphysics                  |
| Chemical Reaction Engineering Module |

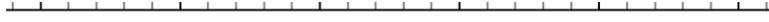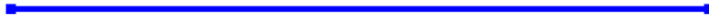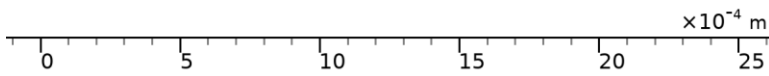

Supporting Electrolyte - Transport of Diluted Species

SELECTION

|                        |                                       |
|------------------------|---------------------------------------|
| Geometric entity level | Domain                                |
| Selection              | Geometry geom1: Dimension 1: Domain 3 |

EQUATIONS

$$\frac{\partial c_i}{\partial t} + \nabla \cdot \mathbf{J}_i = R_i$$

$$\mathbf{J}_i = -D_i \nabla c_i - z_i \mu_{mj} F c_i \nabla V$$

### 2.3.1 Interface Settings

Discretization

SETTINGS

| Description                                          | Value  |
|------------------------------------------------------|--------|
| Concentration                                        | Linear |
| Compute boundary fluxes                              | On     |
| Apply smoothing to boundary fluxes                   | On     |
| Value type when using splitting of complex variables | Real   |

Transport Mechanisms

SETTINGS

| Description                 | Value |
|-----------------------------|-------|
| Convection                  | Off   |
| Migration in electric field | On    |

| Description                   | Value |
|-------------------------------|-------|
| Mass transfer in porous media | Off   |

### Advanced Settings

#### SETTINGS

| Description     | Value                |
|-----------------|----------------------|
| Convective term | Nonconservative form |

### 2.3.2 Transport Properties 1

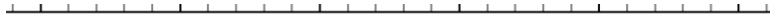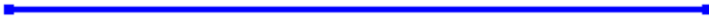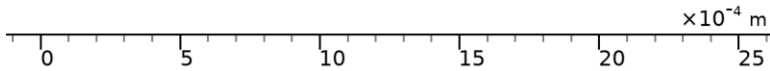

#### Transport Properties 1

#### SELECTION

|                        |                                          |
|------------------------|------------------------------------------|
| Geometric entity level | Domain                                   |
| Selection              | Geometry geom1: Dimension 1: All domains |

#### EQUATIONS

$$\nabla \cdot \mathbf{J}_i = R_i$$

.....

$$\mathbf{J}_i = -D_i \nabla C_i - z_i \mu_{mj} F C_i \nabla V$$

### Diffusion

#### SETTINGS

| Description           | Value        |
|-----------------------|--------------|
| Source                | Material     |
| Material              | None         |
| Diffusion coefficient | User defined |

| Description           | Value                                                  |
|-----------------------|--------------------------------------------------------|
| Diffusion coefficient | {{D_Cation, 0, 0}, {0, D_Cation, 0}, {0, 0, D_Cation}} |
| Diffusion coefficient | User defined                                           |
| Diffusion coefficient | {{D_Anion, 0, 0}, {0, D_Anion, 0}, {0, 0, D_Anion}}    |

### Migration in Electric Field

#### SETTINGS

| Description        | Value                         |
|--------------------|-------------------------------|
| Electric potential | Electric potential (es)       |
| Mobility           | Nernst - Einstein relation    |
| Charge number      | {root.z_Cation, root.z_Anion} |

### Coordinate System Selection

#### SETTINGS

| Description       | Value                    |
|-------------------|--------------------------|
| Coordinate system | Global coordinate system |

### Model Input

#### SETTINGS

| Description | Value        |
|-------------|--------------|
| Temperature | User defined |
| Temperature | T            |

### 2.3.3 No Flux 1

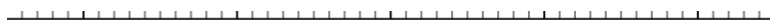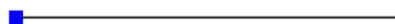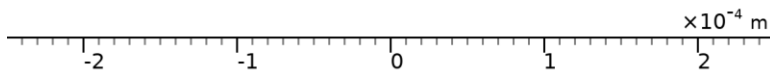

No Flux 1

### SELECTION

|                        |                                             |
|------------------------|---------------------------------------------|
| Geometric entity level | Boundary                                    |
| Selection              | Geometry geom1: Dimension 0: All boundaries |

### EQUATIONS

$$-\mathbf{n} \cdot \mathbf{J}_i = 0$$

## 2.3.4 Initial Values 1

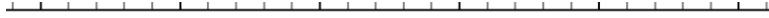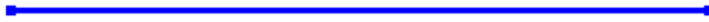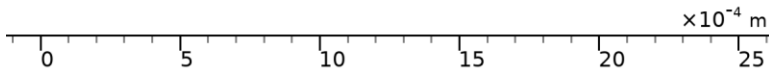

*Initial Values 1*

### SELECTION

|                        |                                          |
|------------------------|------------------------------------------|
| Geometric entity level | Domain                                   |
| Selection              | Geometry geom1: Dimension 1: All domains |

## Initial Values

### SETTINGS

| Description   | Value                           |
|---------------|---------------------------------|
| Concentration | {root.cCation_b, root.cAnion_b} |

### 2.3.5 Concentration on BP 4

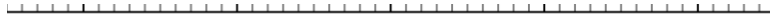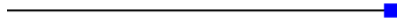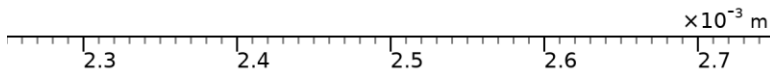

Concentration on BP 4

#### SELECTION

|                        |                                         |
|------------------------|-----------------------------------------|
| Geometric entity level | Boundary                                |
| Selection              | Geometry geom1: Dimension 0: Boundary 4 |

#### EQUATIONS

$$c_i = c_{0j}$$

.....

#### Concentration

##### SETTINGS

| Description     | Value                 |
|-----------------|-----------------------|
| Species cCation | On                    |
| Species cAnion  | On                    |
| Concentration   | {cCation_b, cAnion_b} |

## 2.4 SOLUBLE REDOX SPECIES - TRANSPORT OF DILUTED SPECIES 2

#### USED PRODUCTS

|                                      |
|--------------------------------------|
| COMSOL Multiphysics                  |
| Chemical Reaction Engineering Module |



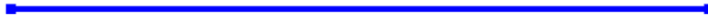

*Soluble Redox Species - Transport of Diluted Species 2*

SELECTION

|                        |                                       |
|------------------------|---------------------------------------|
| Geometric entity level | Domain                                |
| Selection              | Geometry geom1: Dimension 1: Domain 3 |

EQUATIONS

$$\nabla \cdot \mathbf{J}_i = R_i$$

$$\mathbf{J}_i = -D_i \nabla C_i - z \mu_{mj} F C_i \nabla V$$

### 2.4.1 Interface Settings

Discretization

SETTINGS

| Description                                          | Value  |
|------------------------------------------------------|--------|
| Concentration                                        | Linear |
| Compute boundary fluxes                              | On     |
| Apply smoothing to boundary fluxes                   | On     |
| Value type when using splitting of complex variables | Real   |

Transport Mechanisms

SETTINGS

| Description                   | Value |
|-------------------------------|-------|
| Convection                    | Off   |
| Migration in electric field   | On    |
| Mass transfer in porous media | Off   |

## Advanced Settings

### SETTINGS

| Description     | Value                |
|-----------------|----------------------|
| Convective term | Nonconservative form |

## 2.4.2 Transport Properties 1

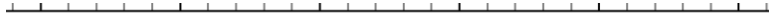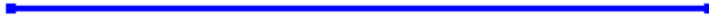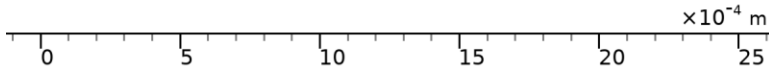

### Transport Properties 1

### SELECTION

|                        |                                          |
|------------------------|------------------------------------------|
| Geometric entity level | Domain                                   |
| Selection              | Geometry geom1: Dimension 1: All domains |

### EQUATIONS

$$\nabla \cdot \mathbf{J}_i = R_i$$

.....

$$\mathbf{J}_i = -D_i \nabla C_i - z_i \mu_{mj} F C_i \nabla V$$

## Diffusion

### SETTINGS

| Description           | Value                                         |
|-----------------------|-----------------------------------------------|
| Source                | Material                                      |
| Material              | None                                          |
| Diffusion coefficient | User defined                                  |
| Diffusion coefficient | {{DcOx, 0, 0}, {0, DcOx, 0}, {0, 0, DcOx}}    |
| Diffusion coefficient | User defined                                  |
| Diffusion coefficient | {{DcRed, 0, 0}, {0, DcRed, 0}, {0, 0, DcRed}} |

## Migration in Electric Field

### SETTINGS

| Description        | Value                      |
|--------------------|----------------------------|
| Electric potential | Electric potential (es)    |
| Mobility           | Nernst - Einstein relation |
| Charge number      | {z_Ox_diff, z_Red_diff}    |

## Coordinate System Selection

### SETTINGS

| Description       | Value                    |
|-------------------|--------------------------|
| Coordinate system | Global coordinate system |

## Model Input

### SETTINGS

| Description | Value        |
|-------------|--------------|
| Temperature | User defined |
| Temperature | T            |

## 2.4.3 No Flux 1

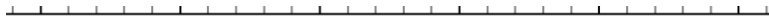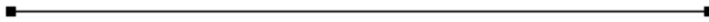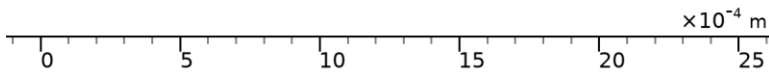

No Flux 1

### SELECTION

|                        |          |
|------------------------|----------|
| Geometric entity level | Boundary |
|------------------------|----------|

|           |                                             |
|-----------|---------------------------------------------|
| Selection | Geometry geom1: Dimension 0: All boundaries |
|-----------|---------------------------------------------|

EQUATIONS

$$-\mathbf{n} \cdot \mathbf{J}_i = 0$$

2.4.4 Initial Values 1

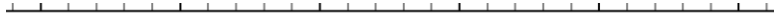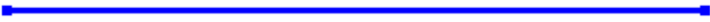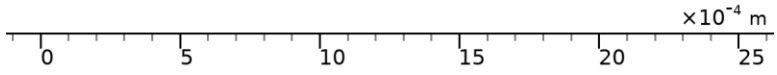

*Initial Values 1*

SELECTION

|                        |                                          |
|------------------------|------------------------------------------|
| Geometric entity level | Domain                                   |
| Selection              | Geometry geom1: Dimension 1: All domains |

Initial Values

SETTINGS

| Description   | Value         |
|---------------|---------------|
| Concentration | {cOx0_dif, 0} |

## 2.4.5 Concentration 1

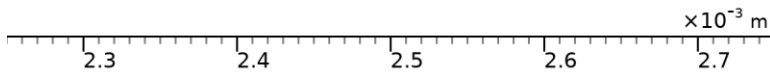

Concentration 1

### SELECTION

|                        |                                         |
|------------------------|-----------------------------------------|
| Geometric entity level | Boundary                                |
| Selection              | Geometry geom1: Dimension 0: Boundary 4 |

### EQUATIONS

$$c_i = c_{0j}$$

.....

### Concentration

#### SETTINGS

| Description      | Value              |
|------------------|--------------------|
| Species cOx_dif  | On                 |
| Species cRed_dif | On                 |
| Concentration    | {root.cOx0_dif, 0} |

## 2.4.6 Butler-Volmer HET

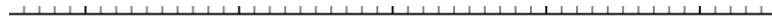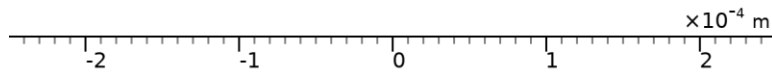

*Butler-Volmer HET*

### SELECTION

|                        |                                         |
|------------------------|-----------------------------------------|
| Geometric entity level | Boundary                                |
| Selection              | Geometry geom1: Dimension 0: Boundary 3 |

### EQUATIONS

$$-\mathbf{n} \cdot \mathbf{J}_i = j_{0,i}$$

### Inward Flux

#### SETTINGS

| Description      | Value                                                                     |
|------------------|---------------------------------------------------------------------------|
| Flux type        | General inward flux                                                       |
| Species cOx_dif  | On                                                                        |
| Species cRed_dif | On                                                                        |
|                  | {-kf_Dif*cOx_dif + kb_Dif*cRed_dif, -(-kf_Dif*cOx_dif + kb_Dif*cRed_dif)} |

## 2.5 ELECTROSTATICS

### USED PRODUCTS

|                     |
|---------------------|
| COMSOL Multiphysics |
|---------------------|



*Electrostatics*

SELECTION

|                        |                                          |
|------------------------|------------------------------------------|
| Geometric entity level | Domain                                   |
| Selection              | Geometry geom1: Dimension 1: All domains |

EQUATIONS

$$\nabla \cdot \mathbf{D} = \rho_v$$

$$\mathbf{E} = -\nabla V$$

## 2.5.1 Interface Settings

### Discretization

SETTINGS

| Description                                          | Value   |
|------------------------------------------------------|---------|
| Electric potential                                   | Linear  |
| Value type when using splitting of complex variables | Complex |

### Manual Terminal Sweep Settings

SETTINGS

| Description               | Value   |
|---------------------------|---------|
| Use manual terminal sweep | Off     |
| Reference impedance       | 50[ohm] |

## 2.5.2 Charge Conservation - Solution

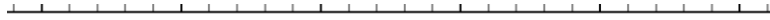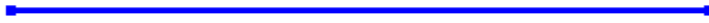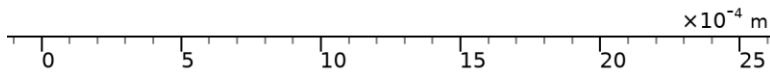

*Charge Conservation - Solution*

### SELECTION

|                        |                                          |
|------------------------|------------------------------------------|
| Geometric entity level | Domain                                   |
| Selection              | Geometry geom1: Dimension 1: All domains |

### EQUATIONS

$$\mathbf{E} = -\nabla V$$

$$\nabla \cdot (\epsilon_0 \epsilon_r \mathbf{E}) = \rho_v$$

### Constitutive Relation D-E

#### SETTINGS

| Description           | Value                                                                    |
|-----------------------|--------------------------------------------------------------------------|
| Dielectric model      | Relative permittivity                                                    |
| Relative permittivity | User defined                                                             |
| Relative permittivity | {{root.epsilon_s, 0, 0}, {0, root.epsilon_s, 0}, {0, 0, root.epsilon_s}} |

### Coordinate System Selection

#### SETTINGS

| Description       | Value                    |
|-------------------|--------------------------|
| Coordinate system | Global coordinate system |

### Model Input

#### SETTINGS



| Description | Value        |
|-------------|--------------|
| Temperature | User defined |
| Temperature | T            |

### 2.5.3 Zero Charge 1

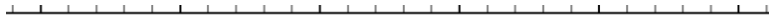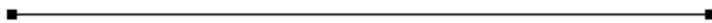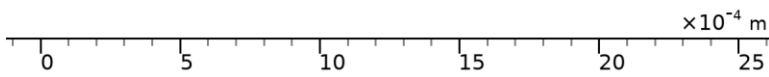

*Zero Charge 1*

#### SELECTION

|                        |                                             |
|------------------------|---------------------------------------------|
| Geometric entity level | Boundary                                    |
| Selection              | Geometry geom1: Dimension 0: All boundaries |

#### EQUATIONS

$$\mathbf{n} \cdot \mathbf{D} = 0$$

## 2.5.4 Initial Values 1

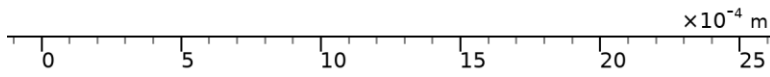

*Initial Values 1*

### SELECTION

|                        |                                          |
|------------------------|------------------------------------------|
| Geometric entity level | Domain                                   |
| Selection              | Geometry geom1: Dimension 1: All domains |

### SETTINGS

| Description        | Value |
|--------------------|-------|
| Electric potential | 0     |

## 2.5.5 Charge Conservation - Inner Film

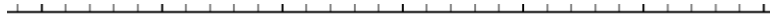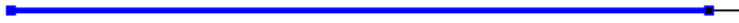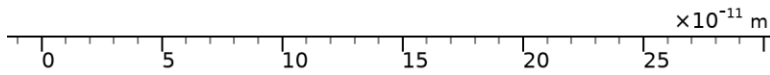

Charge Conservation - Inner Film

### SELECTION

|                        |                                       |
|------------------------|---------------------------------------|
| Geometric entity level | Domain                                |
| Selection              | Geometry geom1: Dimension 1: Domain 1 |

### EQUATIONS

$$\mathbf{E} = -\nabla V$$

$$\nabla \cdot (\epsilon_0 \epsilon_r \mathbf{E}) = \rho_v$$

### Constitutive Relation D-E

#### SETTINGS

| Description           | Value                                                     |
|-----------------------|-----------------------------------------------------------|
| Dielectric model      | Relative permittivity                                     |
| Relative permittivity | User defined                                              |
| Relative permittivity | {{epsilon_1, 0, 0}, {0, epsilon_1, 0}, {0, 0, epsilon_1}} |

### Coordinate System Selection

#### SETTINGS

| Description       | Value                    |
|-------------------|--------------------------|
| Coordinate system | Global coordinate system |

### Model Input

#### SETTINGS

| Description | Value        |
|-------------|--------------|
| Temperature | User defined |
| Temperature | T            |

## 2.5.6 Charge Conservation - Outer Film

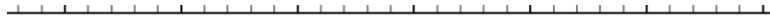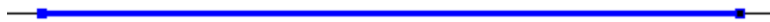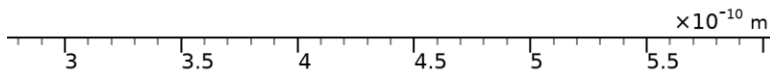

Charge Conservation - Outer Film

### SELECTION

|                        |                                       |
|------------------------|---------------------------------------|
| Geometric entity level | Domain                                |
| Selection              | Geometry geom1: Dimension 1: Domain 2 |

### EQUATIONS

$$\mathbf{E} = -\nabla V$$

$$\nabla \cdot (\epsilon_0 \epsilon_r \mathbf{E}) = \rho_v$$

### Constitutive Relation D-E

#### SETTINGS

| Description           | Value                                                     |
|-----------------------|-----------------------------------------------------------|
| Dielectric model      | Relative permittivity                                     |
| Relative permittivity | User defined                                              |
| Relative permittivity | {{epsilon_2, 0, 0}, {0, epsilon_2, 0}, {0, 0, epsilon_2}} |

### Coordinate System Selection

#### SETTINGS

| Description       | Value                    |
|-------------------|--------------------------|
| Coordinate system | Global coordinate system |

### Model Input

#### SETTINGS

| Description | Value        |
|-------------|--------------|
| Temperature | User defined |
| Temperature | T            |

### 2.5.7 Ground

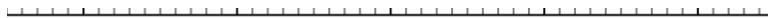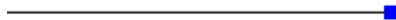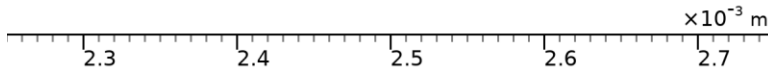

*Ground*

#### SELECTION

|                        |                                         |
|------------------------|-----------------------------------------|
| Geometric entity level | Boundary                                |
| Selection              | Geometry geom1: Dimension 0: Boundary 4 |

#### EQUATIONS

$$V = 0$$

## 2.5.8 Electric Potential - Time Dependent

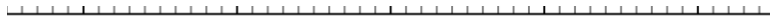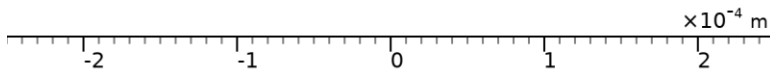

*Electric Potential - Time Dependent*

### SELECTION

|                        |                                         |
|------------------------|-----------------------------------------|
| Geometric entity level | Boundary                                |
| Selection              | Geometry geom1: Dimension 0: Boundary 1 |

### EQUATIONS

$$V = V_0$$

### Electric Potential

#### SETTINGS

| Description        | Value        |
|--------------------|--------------|
| Electric potential | Potential(t) |

## 2.5.9 Space Charge Density - Multiphysics Coupling



*Space Charge Density - Multiphysics Coupling*

### SELECTION

|                        |                                       |
|------------------------|---------------------------------------|
| Geometric entity level | Domain                                |
| Selection              | Geometry geom1: Dimension 1: Domain 3 |

### EQUATIONS

$$\nabla \cdot \mathbf{D} = \rho_v$$

### Coordinate System Selection

#### SETTINGS

| Description       | Value                    |
|-------------------|--------------------------|
| Coordinate system | Global coordinate system |

## 2.6 MESH 1

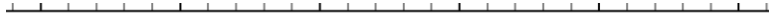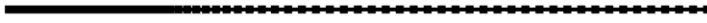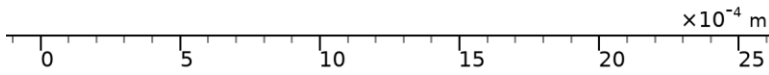

*Mesh 1*

### 2.6.1 Size (size)

#### SETTINGS

| Description                 | Value  |
|-----------------------------|--------|
| Maximum element size        | L/50   |
| Minimum element size        | 3.0E-8 |
| Curvature factor            | 0.3    |
| Maximum element growth rate | 1.3    |
| Custom element size         | Custom |

### 2.6.2 Size 1 (size1)

#### SELECTION

|                        |                                         |
|------------------------|-----------------------------------------|
| Geometric entity level | Boundary                                |
| Selection              | Geometry geom1: Dimension 0: Boundary 3 |



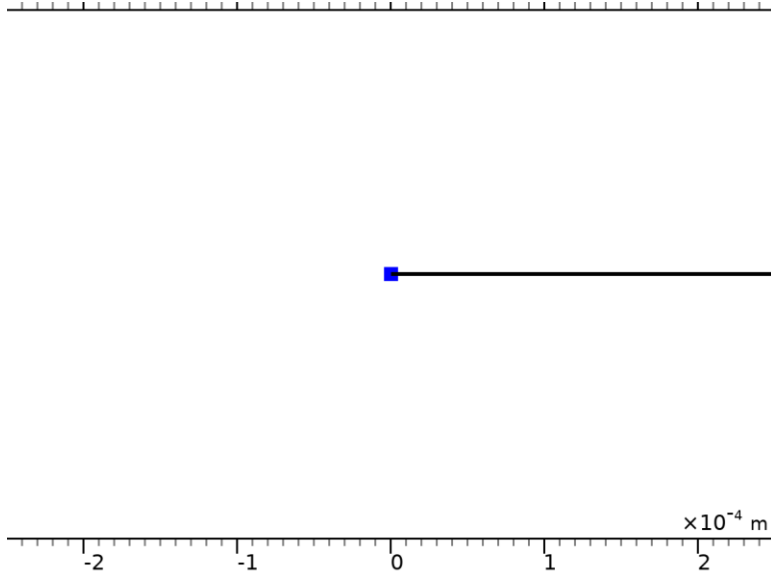

Size 1

#### SETTINGS

| Description                  | Value          |
|------------------------------|----------------|
| Maximum element size         | DebyeLength/20 |
| Minimum element size         | 3.0E-8         |
| Minimum element size         | Off            |
| Curvature factor             | 0.3            |
| Curvature factor             | Off            |
| Resolution of narrow regions | Off            |
| Maximum element growth rate  | 1.05           |
| Custom element size          | Custom         |

### 2.6.3 Size 2 (size2)

#### SELECTION

|                        |                                          |
|------------------------|------------------------------------------|
| Geometric entity level | Domain                                   |
| Selection              | Geometry geom1: Dimension 1: Domains 1-2 |

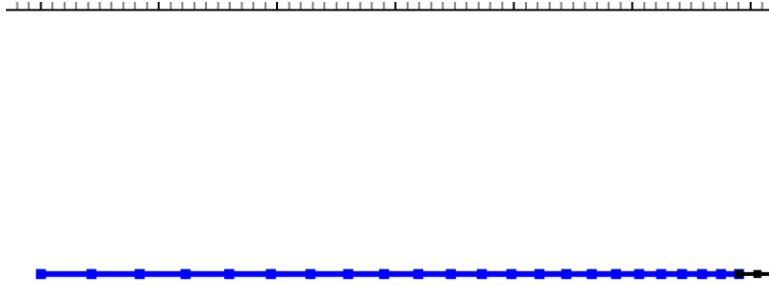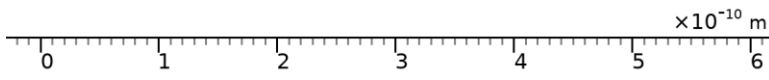

Size 2

SETTINGS

| Description                  | Value    |
|------------------------------|----------|
| Maximum element size         | 0.1 [nm] |
| Minimum element size         | 3.0E-8   |
| Minimum element size         | Off      |
| Curvature factor             | 0.3      |
| Curvature factor             | Off      |
| Resolution of narrow regions | Off      |
| Maximum element growth rate  | 1.05     |
| Custom element size          | Custom   |

### 2.6.4 Edge 1 (edg1)

SELECTION

|                        |                                          |
|------------------------|------------------------------------------|
| Geometric entity level | Domain                                   |
| Selection              | Geometry geom1: Dimension 1: Domains 1-3 |

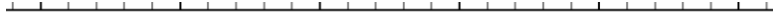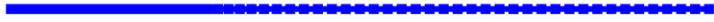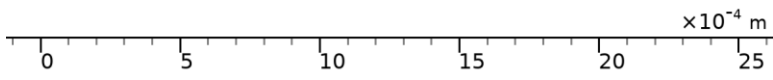

*Edge 1*

### 3 Study 1

#### COMPUTATION INFORMATION

|                  |            |
|------------------|------------|
| Computation time | 5 min 31 s |
|------------------|------------|

#### 3.1 PARAMETRIC SWEEP

| Parameter name | Parameter value list | Parameter unit |
|----------------|----------------------|----------------|
| v              | 1                    | V/s            |

#### STUDY SETTINGS

| Description    | Value                  |
|----------------|------------------------|
| Sweep type     | Specified combinations |
| Parameter name | v                      |
| Unit           | V/s                    |

#### PARAMETERS

| Parameter name | Parameter value list | Parameter unit |
|----------------|----------------------|----------------|
| v (Scan rate)  | 1                    | V/s            |

#### 3.2 STATIONARY

#### STUDY SETTINGS

| Description                    | Value |
|--------------------------------|-------|
| Include geometric nonlinearity | Off   |

#### VALUES OF DEPENDENT VARIABLES

| Description | Value           |
|-------------|-----------------|
| Settings    | User controlled |

#### PHYSICS AND VARIABLES SELECTION

| Physics interface                                             | Discretization |
|---------------------------------------------------------------|----------------|
| Supporting Electrolyte - Transport of Diluted Species (tds)   | physics        |
| Soluble Redox Species - Transport of Diluted Species 2 (tds2) | physics        |
| Electrostatics (es)                                           | physics        |

#### MESH SELECTION

| Geometry           | Mesh  |
|--------------------|-------|
| Geometry 1 (geom1) | mesh1 |

### 3.3 TIME DEPENDENT

| Times                                                      | Unit |
|------------------------------------------------------------|------|
| range(0, sampling_time, 2*Segment_Duration+Start_Duration) | s    |

#### STUDY SETTINGS

| Description                    | Value |
|--------------------------------|-------|
| Include geometric nonlinearity | Off   |

#### VALUES OF DEPENDENT VARIABLES

| Description | Value                   |
|-------------|-------------------------|
| Settings    | User controlled         |
| Method      | Solution                |
| Study       | <a href="#">Study 1</a> |

#### PHYSICS AND VARIABLES SELECTION

| Physics interface                                             | Discretization |
|---------------------------------------------------------------|----------------|
| Supporting Electrolyte - Transport of Diluted Species (tds)   | physics        |
| Soluble Redox Species - Transport of Diluted Species 2 (tds2) | physics        |
| Electrostatics (es)                                           | physics        |

#### MESH SELECTION

| Geometry           | Mesh  |
|--------------------|-------|
| Geometry 1 (geom1) | mesh1 |

### 3.4 SOLVER CONFIGURATIONS

#### 3.4.1 Solution 2

##### Compile Equations: Stationary (st1)

#### STUDY AND STEP

| Description    | Value                      |
|----------------|----------------------------|
| Use study      | <a href="#">Study 1</a>    |
| Use study step | <a href="#">Stationary</a> |

##### Dependent Variables 1 (v1)

#### GENERAL

| Description           | Value                      |
|-----------------------|----------------------------|
| Defined by study step | <a href="#">Stationary</a> |

INITIAL VALUE CALCULATION CONSTANTS

| Constant name | Initial value source     |
|---------------|--------------------------|
| t             | 0                        |
| timestep      | 0.0013000000000000002[s] |

Concentration (comp1.cAnion) (comp1\_cAnion)

GENERAL

| Description        | Value                                    |
|--------------------|------------------------------------------|
| Field components   | comp1.cAnion                             |
| Internal variables | {comp1.uflux.cAnion, comp1.dflux.cAnion} |

Concentration (comp1.cCation) (comp1\_cCation)

GENERAL

| Description        | Value                                      |
|--------------------|--------------------------------------------|
| Field components   | comp1.cCation                              |
| Internal variables | {comp1.uflux.cCation, comp1.dflux.cCation} |

Electric potential (comp1.Phi) (comp1\_Phi)

GENERAL

| Description      | Value     |
|------------------|-----------|
| Field components | comp1.Phi |

Concentration (comp1.cOx\_dif) (comp1\_cOx\_dif)

GENERAL

| Description        | Value                                      |
|--------------------|--------------------------------------------|
| Field components   | comp1.cOx_dif                              |
| Internal variables | {comp1.uflux.cOx_dif, comp1.dflux.cOx_dif} |

Concentration (comp1.cRed\_dif) (comp1\_cRed\_dif)

GENERAL

| Description        | Value                                        |
|--------------------|----------------------------------------------|
| Field components   | comp1.cRed_dif                               |
| Internal variables | {comp1.uflux.cRed_dif, comp1.dflux.cRed_dif} |

Stationary Solver 1 (s1)

GENERAL

| Description           | Value                      |
|-----------------------|----------------------------|
| Defined by study step | <a href="#">Stationary</a> |

#### RESULTS WHILE SOLVING

| Description | Value |
|-------------|-------|
| Probes      | None  |

#### CONSTANTS

| Constant name | Constant value |
|---------------|----------------|
| t             | 0              |

#### Advanced (aDef)

##### ASSEMBLY SETTINGS

| Description            | Value |
|------------------------|-------|
| Reuse sparsity pattern | On    |

#### Fully Coupled 1 (fc1)

##### GENERAL

| Description   | Value                    |
|---------------|--------------------------|
| Linear solver | <a href="#">Direct 1</a> |

##### METHOD AND TERMINATION

| Description                  | Value  |
|------------------------------|--------|
| Initial damping factor       | 0.01   |
| Minimum damping factor       | 1.0E-6 |
| Maximum number of iterations | 50     |

#### Direct 1 (d1)

##### GENERAL

| Description           | Value   |
|-----------------------|---------|
| Solver                | PARDISO |
| Pivoting perturbation | 1.0E-13 |

#### Solution Store 1 (su1)

##### GENERAL

| Description | Value            |
|-------------|------------------|
| Solution    | Solution Store 1 |

#### Compile Equations: Time Dependent (st2)

##### STUDY AND STEP

| Description | Value                   |
|-------------|-------------------------|
| Use study   | <a href="#">Study 1</a> |

| Description    | Value                          |
|----------------|--------------------------------|
| Use study step | <a href="#">Time Dependent</a> |

## Dependent Variables 2 (v2)

### GENERAL

| Description           | Value                          |
|-----------------------|--------------------------------|
| Defined by study step | <a href="#">Time Dependent</a> |

### INITIAL VALUES OF VARIABLES SOLVED FOR

| Description | Value                      |
|-------------|----------------------------|
| Method      | Solution                   |
| Solution    | <a href="#">Solution 2</a> |

### RESIDUAL SCALING

| Description | Value  |
|-------------|--------|
| Method      | Manual |

### VALUES OF VARIABLES NOT SOLVED FOR

| Description | Value                      |
|-------------|----------------------------|
| Method      | Solution                   |
| Solution    | <a href="#">Solution 2</a> |

### INITIAL VALUE CALCULATION CONSTANTS

| Constant name | Initial value source                                       |
|---------------|------------------------------------------------------------|
| t             | range(0, sampling_time, 2*Segment_Duration+Start_Duration) |
| timestep      | 0.0013000000000000002[s]                                   |

## Concentration (comp1.cAnion) (comp1\_cAnion)

### GENERAL

| Description        | Value                                                             |
|--------------------|-------------------------------------------------------------------|
| Field components   | comp1.cAnion                                                      |
| Internal variables | {comp1.uflux.cAnion, comp1.dflux.cAnion, comp1.tds.dt2Inv_cAnion} |

## Concentration (comp1.cCation) (comp1\_cCation)

### GENERAL

| Description        | Value                                                                |
|--------------------|----------------------------------------------------------------------|
| Field components   | comp1.cCation                                                        |
| Internal variables | {comp1.uflux.cCation, comp1.dflux.cCation, comp1.tds.dt2Inv_cCation} |



### Electric potential (comp1.Phi) (comp1\_Phi)

#### GENERAL

| Description      | Value     |
|------------------|-----------|
| Field components | comp1.Phi |

### Concentration (comp1.cOx\_dif) (comp1\_cOx\_dif)

#### GENERAL

| Description        | Value                                                                 |
|--------------------|-----------------------------------------------------------------------|
| Field components   | comp1.cOx_dif                                                         |
| Internal variables | {comp1.uflux.cOx_dif, comp1.dflux.cOx_dif, comp1.tds2.dt2Inv_cOx_dif} |

### Concentration (comp1.cRed\_dif) (comp1\_cRed\_dif)

#### GENERAL

| Description        | Value                                                                    |
|--------------------|--------------------------------------------------------------------------|
| Field components   | comp1.cRed_dif                                                           |
| Internal variables | {comp1.uflux.cRed_dif, comp1.dflux.cRed_dif, comp1.tds2.dt2Inv_cRed_dif} |

### Time-Dependent Solver 1 (t1)

#### TIME STEPPING

| Description           | Value  |
|-----------------------|--------|
| Steps taken by solver | Strict |
| Maximum BDF order     | 2      |
| Nonlinear controller  | On     |

### Advanced (aDef)

#### ASSEMBLY SETTINGS

| Description            | Value |
|------------------------|-------|
| Reuse sparsity pattern | On    |

### Fully Coupled 1 (fc1)

#### GENERAL

| Description   | Value                    |
|---------------|--------------------------|
| Linear solver | <a href="#">Direct 1</a> |

#### METHOD AND TERMINATION

| Description                  | Value              |
|------------------------------|--------------------|
| Nonlinear method             | Automatic (Newton) |
| Maximum number of iterations | 8                  |

### Direct 1 (d1)

#### GENERAL

| Description           | Value   |
|-----------------------|---------|
| Solver                | PARDISO |
| Pivoting perturbation | 1.0E-13 |

### 3.4.2 Parametric Solutions 1

#### v=1 (su1)

#### GENERAL

| Description | Value |
|-------------|-------|
| Solution    | v=1   |

## 4 Results

### 4.1 PLOT GROUPS

#### 4.1.1 Current Density

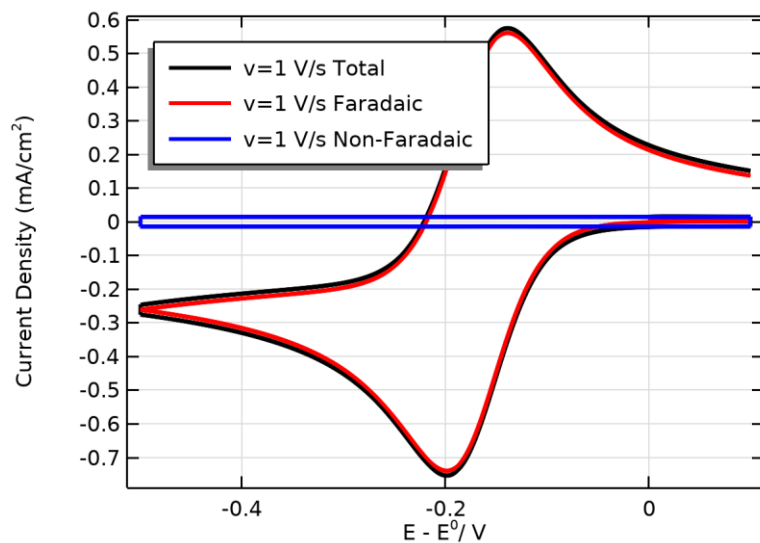

#### 4.1.2 Surface Species Concentration - Time Dependent

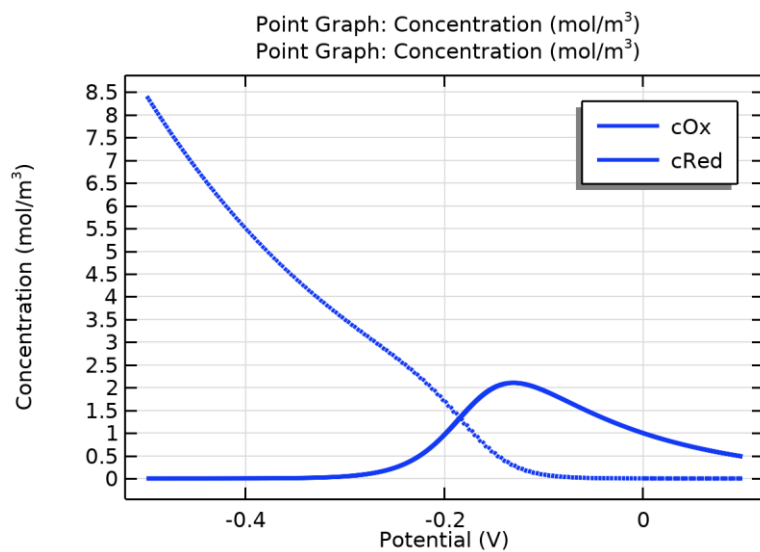

Point Graph: Concentration (mol/m<sup>3</sup>) Point Graph: Concentration (mol/m<sup>3</sup>)

### 4.1.3 Interfacial Potential

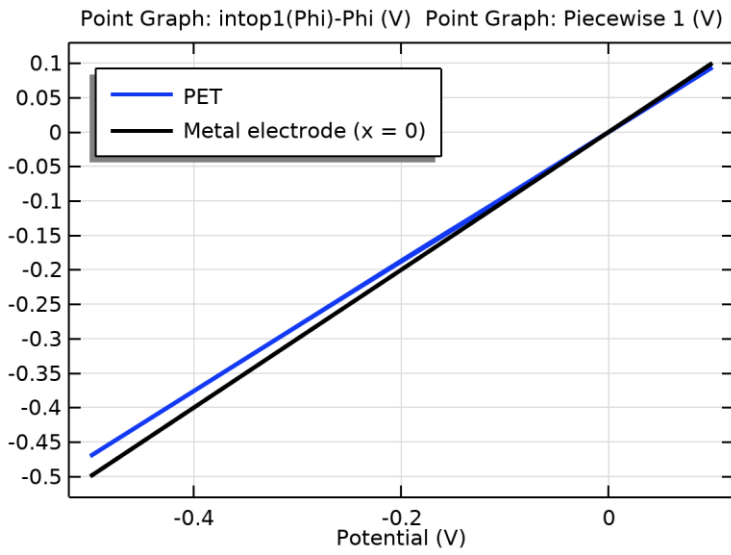

Point Graph: intop1(Phi)-Phi (V) Point Graph: Piecewise 1 (V)

### 4.1.4 Concentrations Ox/Red

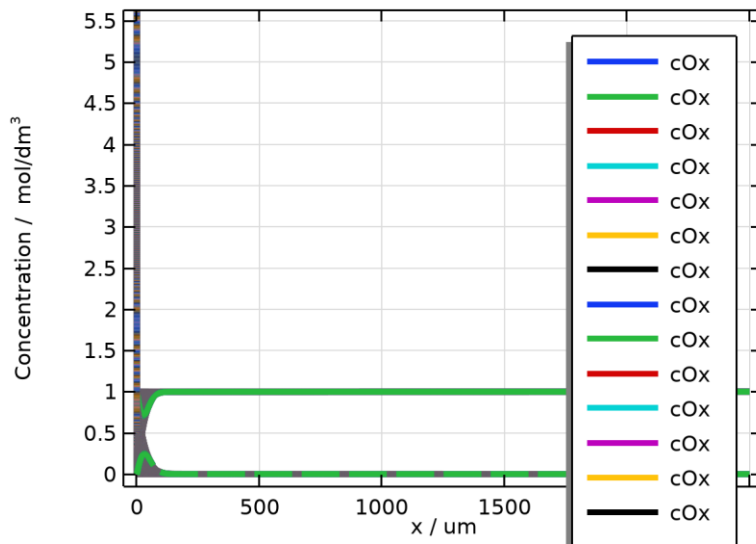

### 4.1.5 Electric Potential across solution - Time Dependent

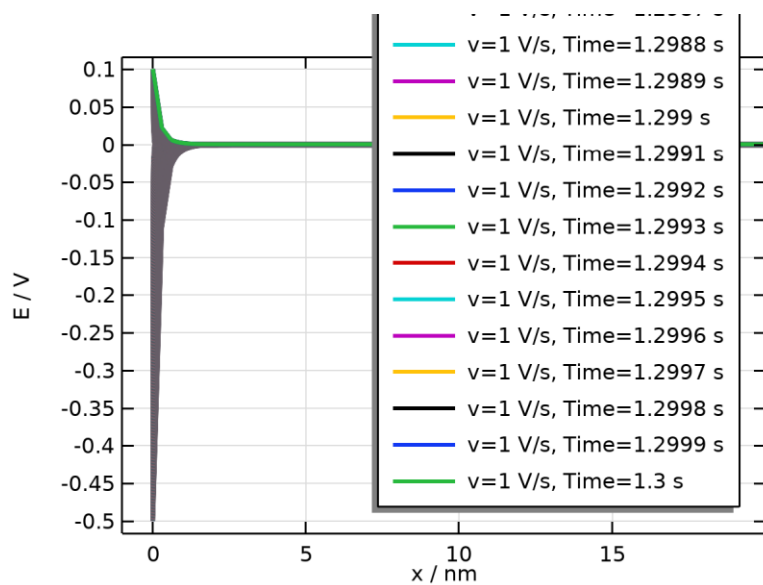

### 4.1.6 Probe Plot Group 26

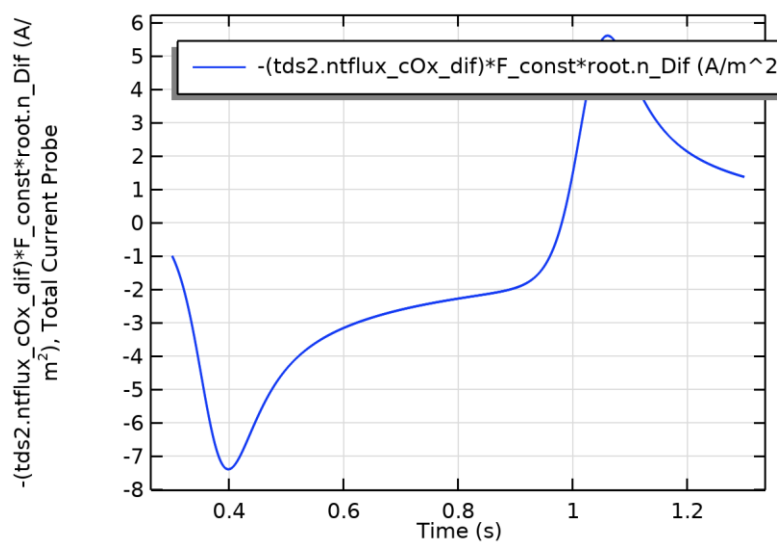

Supplement: d3cp00098b2.pdf [file d3cp00098b2.pdf]
