# Supplementary material for: Simulation of the cyclic voltammetric response of an outer-sphere redox species with inclusion of electrical double layer structure and ohmic potential drop
Source: Royal Society of Chemistry journal article supplement (doi:10.1039/d3cp00098b), 2023-01-01

# COMSOL Model Report B – Electrostatic Model of a Soluble Redox Couple with Ohmic Potential Drop Compensation

|             |                         |
|-------------|-------------------------|
| Report date | Dec 16, 2022 4:44:09 PM |
|-------------|-------------------------|

# Contents

|          |                                               |           |
|----------|-----------------------------------------------|-----------|
| <b>1</b> | <b>Global Definitions .....</b>               | <b>3</b>  |
| 1.1      | Parameters .....                              | 3         |
| 1.2      | Functions.....                                | 6         |
| <b>2</b> | <b>Component 1 .....</b>                      | <b>8</b>  |
| 2.1      | Definitions .....                             | 8         |
| 2.2      | Geometry 1 .....                              | 15        |
| 2.3      | Transport of Diluted Species.....             | 16        |
| 2.4      | Transport of Diluted Species 2.....           | 22        |
| 2.5      | Electrostatics.....                           | 30        |
| 2.6      | Mesh 1 .....                                  | 39        |
| <b>3</b> | <b>Component (IR drop compensation) .....</b> | <b>43</b> |
| 3.1      | Definitions .....                             | 43        |
| 3.2      | Global ODEs and DAEs .....                    | 43        |
| <b>4</b> | <b>Study (time-dependent) .....</b>           | <b>45</b> |
| 4.1      | Parametric Sweep .....                        | 45        |
| 4.2      | Stationary.....                               | 45        |
| 4.3      | Time Dependent .....                          | 46        |
| 4.4      | Solver Configurations .....                   | 46        |
| <b>5</b> | <b>Results .....</b>                          | <b>52</b> |
| 5.1      | Plot Groups .....                             | 52        |

# 1 Global Definitions

|      |                         |
|------|-------------------------|
| Date | Dec 16, 2022 4:10:09 PM |
|------|-------------------------|

## GLOBAL SETTINGS

|         |                                      |
|---------|--------------------------------------|
| Version | COMSOL Multiphysics 5.6 (Build: 280) |
|---------|--------------------------------------|

## USED PRODUCTS

|                                      |
|--------------------------------------|
| COMSOL Multiphysics                  |
| Chemical Reaction Engineering Module |

## COMPUTER INFORMATION

|                  |                                                |
|------------------|------------------------------------------------|
| CPU              | Intel64 Family 6 Model 158 Stepping 9, 4 cores |
| Operating system | Windows 10                                     |

## 1.1 PARAMETERS

### 1.1.1 General System & Geometry

#### GENERAL SYSTEM & GEOMETRY

| Name      | Expression                                   | Value                                | Description                                                                                  |
|-----------|----------------------------------------------|--------------------------------------|----------------------------------------------------------------------------------------------|
| epsilon_s | 80                                           | 80                                   | The relative dielectric constant of bulk water, assuming $T = 293\text{K}$                   |
| cAnion_b  | $c\text{NO}_3\text{b} + c\text{CounterIon0}$ | $1003 \text{ mol/m}^3$               | Bulk anion concentration of supporting electrolyte including counter ion of the redox couple |
| cCation_b | $c\text{Kb}$                                 | $1000 \text{ mol/m}^3$               | Bulk cation concentration of supporting electrolyte                                          |
| cKb       | $1[\text{M}]$                                | $1000 \text{ mol/m}^3$               |                                                                                              |
| cNO3b     | $c\text{Kb}$                                 | $1000 \text{ mol/m}^3$               |                                                                                              |
| D_K       | $2.0 \cdot 10^{-5} [\text{cm}^2/\text{s}]$   | $2\text{E}-9 \text{ m}^2/\text{s}$   | Diffusion coefficient for $\text{K}^+ = 1.957$                                               |
| D_NO3     | $1.9 \cdot 10^{-5} [\text{cm}^2/\text{s}]$   | $1.9\text{E}-9 \text{ m}^2/\text{s}$ | Diffusion coefficient for $\text{ClO}_4^- = 1.902$                                           |
| D_Anion   | D_NO3                                        | $1.9\text{E}-9 \text{ m}^2/\text{s}$ |                                                                                              |
| D_Cation  | D_K                                          | $2\text{E}-9 \text{ m}^2/\text{s}$   |                                                                                              |
| L         | $0.25[\text{cm}]$                            | $0.0025 \text{ m}$                   | Length of domain/boundary                                                                    |
| z_Anion   | -1                                           | -1                                   | The electrostatic charge of supporting electrolyte anion                                     |

| Name         | Expression                                                                                                                                                                                                                                                             | Value                             | Description                                               |
|--------------|------------------------------------------------------------------------------------------------------------------------------------------------------------------------------------------------------------------------------------------------------------------------|-----------------------------------|-----------------------------------------------------------|
| z_Cation     | +1                                                                                                                                                                                                                                                                     | 1                                 | The electrostatic charge of supporting electrolyte cation |
| T            | 293.15 [K]                                                                                                                                                                                                                                                             | 293.15 K                          | Temperature                                               |
| conductivity | $F_{\text{const}}*(F_{\text{RT}}*D_{\text{Cation}}*c_{\text{Cation}_b} + F_{\text{RT}}*D_{\text{Anion}}*c_{\text{Anion}_b} + F_{\text{RT}}*D_{\text{cOx}}*c_{\text{Ox0\_dif}})$                                                                                        | 14.92 S/m                         |                                                           |
| Resistance   | L/conductivity                                                                                                                                                                                                                                                         | 1.6756E-4 $\Omega\cdot\text{m}^2$ |                                                           |
| F_RT         | $(n*F_{\text{const}})/(R_{\text{const}}*T)$                                                                                                                                                                                                                            | 39.586 1/V                        |                                                           |
| Kappa        | $e_{\text{const}}*\text{sqrt}(\frac{((z_{\text{Cation}}^2)*c_{\text{Cation}_b} + (z_{\text{Anion}}^2)*c_{\text{Anion}_b} + c_{\text{Ox0\_dif}}*(z_{\text{Ox\_diff}}^2))*N_{\text{A\_const}}}{(\epsilon_{\text{s}}*\epsilon_{\text{0\_const}}*k_{\text{B\_const}}*T)})$ | 3.2938E9 1/m                      | Inverse Debye length                                      |
| DebyeLength  | 1/Kappa                                                                                                                                                                                                                                                                | 3.036E-10 m                       | Debye length                                              |

## 1.1.2 Stern Layer

### STERN LAYER

| Name      | Expression             | Value                    | Description                                         |
|-----------|------------------------|--------------------------|-----------------------------------------------------|
| epsilon_1 | 6                      | 6                        | The relative dielectric constant of the Stern layer |
| A         | $(1[\text{mm}])^2*\pi$ | 3.1416E-6 m <sup>2</sup> | Electrode area                                      |
| d1        | 0.29 [nm]              | 2.9E-10 m                | Stern layer thickness                               |
| d2        | 0.59 [nm]              | 5.9E-10 m                | Stern layer thickness                               |
| epsilon_2 | 30                     | 30                       | The relative dielectric constant of the Stern layer |

## 1.1.3 Diffusing Redox Species

### DIFFUSING REDOX SPECIES

| Name      | Expression                                   | Value                       | Description                                          |
|-----------|----------------------------------------------|-----------------------------|------------------------------------------------------|
| DcOx      | $7.5*10^{-6}[\text{cm}^2/\text{s}]$          | 7.5E-10 m <sup>2</sup> /s   | Diffusion Coefficient Oxidised species               |
| DcRed     | DcOx/0.72                                    | 1.0417E-9 m <sup>2</sup> /s | Diffusion Coefficient reduced species                |
| cOx0_dif  | 1 [mM]                                       | 1 mol/m <sup>3</sup>        | Initial concentration of Ox species                  |
| k0_Dif    | 13.5 [cm/s]                                  | 0.135 m/s                   | Heterogeneous electron transfer rate constant (fast) |
| alpha_Dif | 0.45                                         | 0.45                        | Transfer coefficient                                 |
| n         | $z_{\text{Ox\_diff}} - z_{\text{Red\_diff}}$ | 1                           | Number of electrons transferred                      |

| Name         | Expression | Value                | Description                                                     |
|--------------|------------|----------------------|-----------------------------------------------------------------|
| E0_Dif       | -0.173 [V] | -0.173 V             | Standard redox potential for [Ru(NH3)6] <sup>+3/+2</sup> Vs SCE |
| z_Red_diff   | +2         | 2                    | The electrostatic charge of the reduced species                 |
| z_Ox_diff    | +3         | 3                    | The electrostatic charge of the oxidised species                |
| cCounterIon0 | cOx0_dif*3 | 3 mol/m <sup>3</sup> | The concentration of the balancing counterion                   |

## 1.1.4 CV Waveform

### CV WAVEFORM

| Name             | Expression                                                                                        | Value    | Description                                                                                 |
|------------------|---------------------------------------------------------------------------------------------------|----------|---------------------------------------------------------------------------------------------|
| E_Start          | 0 [V]                                                                                             | 0 V      | Starting potential applied to the working electrode                                         |
| Start_Duration   | (E_High - E_Start)/v                                                                              | 1E-4 s   | Starting scan duration                                                                      |
| ScanRange        | abs(E_High - E_Low)                                                                               | 0.6 V    | Absolute scan range                                                                         |
| Segment_Duration | ScanRange/v                                                                                       | 6E-4 s   | Length of one sweep                                                                         |
| v                | 1000 [V/s]                                                                                        | 1000 V/s | Scan rate                                                                                   |
| sampling         | 1 [mV]                                                                                            | 0.001 V  | Potential step size of the CV                                                               |
| E_Low            | -0.5 [V]                                                                                          | -0.5 V   | Switching potential, the lowest potential applied to the working electrode                  |
| sampling_time    | (2*Segment_Duration + Start_Duration)/(((abs(E_High - E_Low)*2 + (E_High - E_Start)))/(sampling)) | 1E-6 s   | Corresponding sampling time interval for the potential step size at the specified scan rate |
| E_High           | 0.1 [V]                                                                                           | 0.1 V    | Switching potential, the highest potential applied to the                                   |

| Name     | Expression                            | Value    | Description       |
|----------|---------------------------------------|----------|-------------------|
|          |                                       |          | working electrode |
| Durr_Tot | (2*Segment_Duration + Start_Duration) | 0.0013 s |                   |

## 1.1.5 Ohmic drop compensation

### OHMIC DROP COMPENSATION

| Name                  | Expression | Value | Description                                                    |
|-----------------------|------------|-------|----------------------------------------------------------------|
| Gain                  | 1e8        | 1E8   | "Gain" in the ohmic drop 'compensation circuit' (proportional) |
| OhmicDropCompensation | 95[%]      | 0.95  | Amount of ohmic drop that is attempted to be corrected for     |

## 1.2 FUNCTIONS

### 1.2.1 Uncorrected potential

|               |                      |
|---------------|----------------------|
| Function name | UncorrectedPotential |
| Function type | Piecewise            |

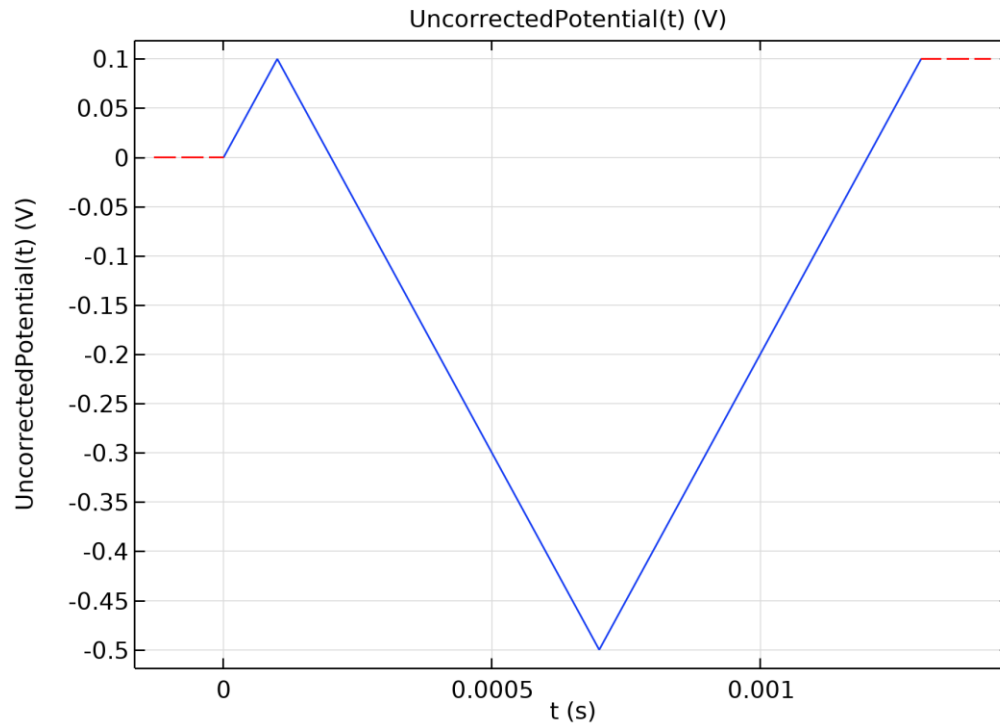

*Uncorrected potential*

**DEFINITION**

| Description   | Value        |
|---------------|--------------|
| Argument      | t            |
| Extrapolation | Constant     |
| Smoothing     | No smoothing |

**DEFINITION**

| Start                           | End                               | Function                                          |
|---------------------------------|-----------------------------------|---------------------------------------------------|
| 0                               | Start_Duration                    | $E_{Start}+v*t$                                   |
| Start_Duration                  | Start_Duration+Segment_Duration   | $E_{High}-v*(t-Start\_Duration)$                  |
| Start_Duration+Segment_Duration | Start_Duration+2*Segment_Duration | $E_{Low}+v*(t-Segment\_Duration-Start\_Duration)$ |
|                                 |                                   |                                                   |

**UNITS**

| Description | Value |
|-------------|-------|
| Arguments   | s     |
| Function    | V     |

## 2 Component 1

### SETTINGS

| Description | Value                      |
|-------------|----------------------------|
| Unit system | Same as global system (SI) |

## 2.1 DEFINITIONS

### 2.1.1 Variables

#### ET kinetics

##### SELECTION

|                        |              |
|------------------------|--------------|
| Geometric entity level | Entire model |
|------------------------|--------------|

| Name               | Expression                                                                                                              | Unit | Description                             |
|--------------------|-------------------------------------------------------------------------------------------------------------------------|------|-----------------------------------------|
| kf                 | $k0\_Dif \cdot \exp(-\alpha\_Dif \cdot F\_RT \cdot (\text{CorrectedPotential} - E0\_Dif - \text{intop2}(\Phi)))$        | m/s  |                                         |
| kb                 | $k0\_Dif \cdot \exp(((1 - \alpha\_Dif) \cdot F\_RT \cdot (\text{CorrectedPotential} - E0\_Dif - \text{intop2}(\Phi))))$ | m/s  |                                         |
| CorrectedPotential | UncorrectedPotential(t) + comp2.IR*OhmicDropCompensation                                                                | V    | Applied potential corrected for IR drop |

### 2.1.2 Probes

#### Applied potential probe (uncorrected)

|            |                       |
|------------|-----------------------|
| Probe type | Global variable probe |
|------------|-----------------------|

##### EXPRESSION

| Description         | Value                         |
|---------------------|-------------------------------|
| Expression          | UncorrectedPotential(t)       |
| Table and plot unit | V                             |
| Description         | Applied potential Uncorrected |

##### TABLE AND WINDOW SETTINGS

| Description  | Value        |
|--------------|--------------|
| Output table | Probe Table  |
| Plot window  | Probe Plot 3 |



### Applied potential probe (corrected)

|            |                       |
|------------|-----------------------|
| Probe type | Global variable probe |
|------------|-----------------------|

#### EXPRESSION

| Description         | Value                       |
|---------------------|-----------------------------|
| Expression          | CorrectedPotential          |
| Table and plot unit | V                           |
| Description         | Applied potential Corrected |

#### TABLE AND WINDOW SETTINGS

| Description  | Value        |
|--------------|--------------|
| Output table | Probe Table  |
| Plot window  | Probe Plot 3 |

### Total current

|            |             |
|------------|-------------|
| Probe type | Point probe |
|------------|-------------|

#### SELECTION

|                        |                                         |
|------------------------|-----------------------------------------|
| Geometric entity level | Boundary                                |
| Selection              | Geometry geom1: Dimension 0: Boundary 3 |

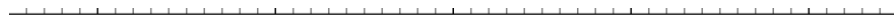

*Selection*

#### PROBE TYPE

| Description | Value    |
|-------------|----------|
| Type        | Integral |

EXPRESSION

| Description         | Value                |
|---------------------|----------------------|
| Expression          | CurrentF + CurrentNF |
| Table and plot unit | A/m <sup>2</sup>     |
| Description         | iTot                 |

TABLE AND WINDOW SETTINGS

| Description  | Value        |
|--------------|--------------|
| Output table | Probe Table  |
| Plot window  | Probe Plot 2 |

Faradaic current

|            |             |
|------------|-------------|
| Probe type | Point probe |
|------------|-------------|

SELECTION

|                        |                                         |
|------------------------|-----------------------------------------|
| Geometric entity level | Boundary                                |
| Selection              | Geometry geom1: Dimension 0: Boundary 3 |

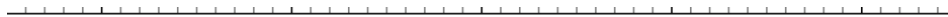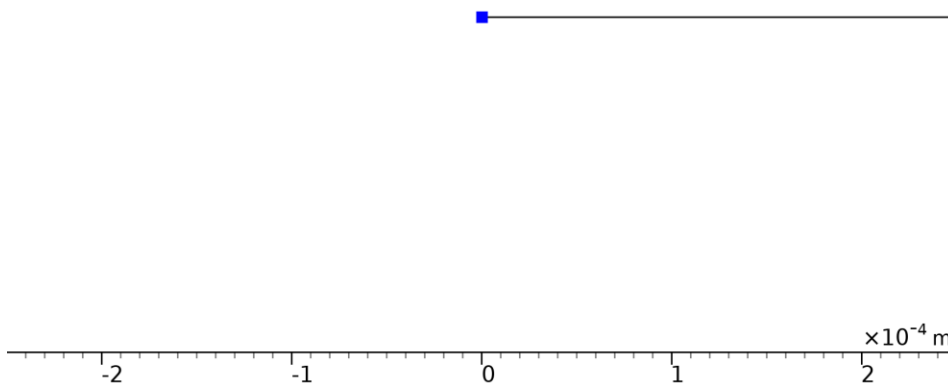

Selection

PROBE TYPE

| Description | Value    |
|-------------|----------|
| Type        | Integral |

#### EXPRESSION

| Description         | Value                                                             |
|---------------------|-------------------------------------------------------------------|
| Expression          | $(-k_f \cdot c_{Ox} + k_b \cdot c_{Red}) \cdot F_{const} \cdot n$ |
| Table and plot unit | A/m <sup>2</sup>                                                  |
| Description         | iF                                                                |

#### TABLE AND WINDOW SETTINGS

| Description  | Value        |
|--------------|--------------|
| Output table | Probe Table  |
| Plot window  | Probe Plot 2 |

#### Non-faradaic current

|            |             |
|------------|-------------|
| Probe type | Point probe |
|------------|-------------|

#### SELECTION

|                        |                                         |
|------------------------|-----------------------------------------|
| Geometric entity level | Boundary                                |
| Selection              | Geometry geom1: Dimension 0: Boundary 3 |

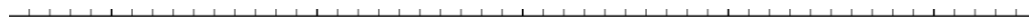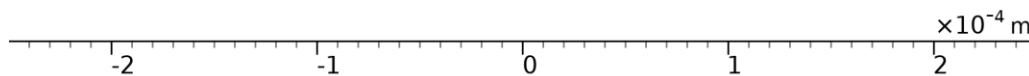

Selection

PROBE TYPE

| Description | Value    |
|-------------|----------|
| Type        | Integral |

EXPRESSION

| Description         | Value               |
|---------------------|---------------------|
| Expression          | intop1(d(es.nD, t)) |
| Table and plot unit | A/m <sup>2</sup>    |
| Description         | iNF                 |

TABLE AND WINDOW SETTINGS

| Description  | Value        |
|--------------|--------------|
| Output table | Probe Table  |
| Plot window  | Probe Plot 2 |

**Ohmic drop (100%)**

|            |             |
|------------|-------------|
| Probe type | Point probe |
|------------|-------------|

SELECTION

|                        |                                         |
|------------------------|-----------------------------------------|
| Geometric entity level | Boundary                                |
| Selection              | Geometry geom1: Dimension 0: Boundary 3 |

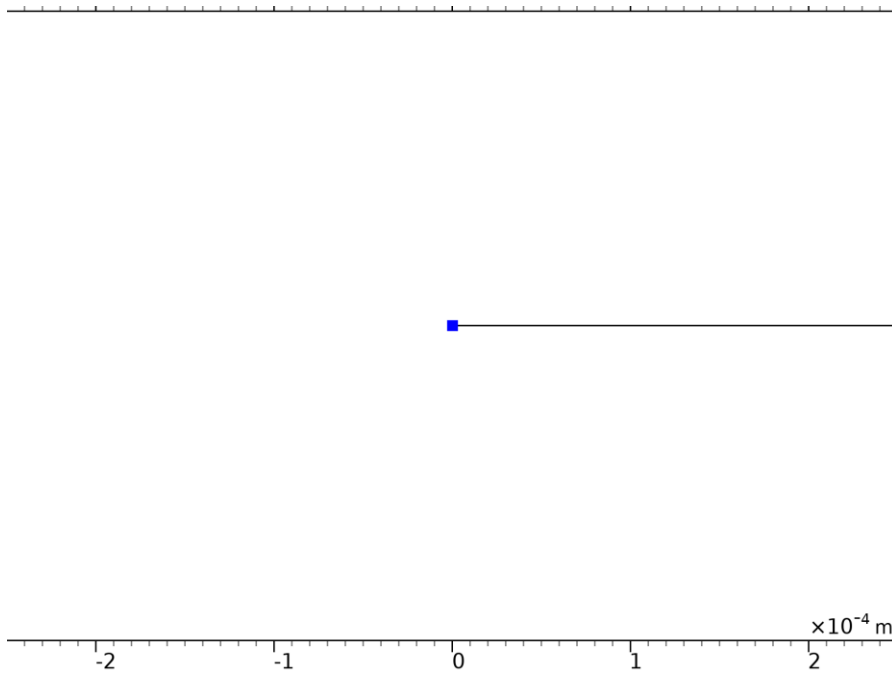

*Selection*

PROBE TYPE

| Description | Value    |
|-------------|----------|
| Type        | Integral |

#### EXPRESSION

| Description         | Value                 |
|---------------------|-----------------------|
| Expression          | CurrentTot*Resistance |
| Table and plot unit | V                     |
| Description         | IR                    |

#### TABLE AND WINDOW SETTINGS

| Description  | Value        |
|--------------|--------------|
| Output table | Probe Table  |
| Plot window  | Probe Plot 3 |

#### Domain Point Probe (potential just outside double layer)

|            |                    |
|------------|--------------------|
| Probe type | Domain point probe |
|------------|--------------------|

### 2.1.3 Nonlocal Couplings

#### Electrode surface coupling

|               |             |
|---------------|-------------|
| Coupling type | Integration |
| Operator name | intop1      |

#### SELECTION

|                        |                                         |
|------------------------|-----------------------------------------|
| Geometric entity level | Boundary                                |
| Selection              | Geometry geom1: Dimension 0: Boundary 1 |

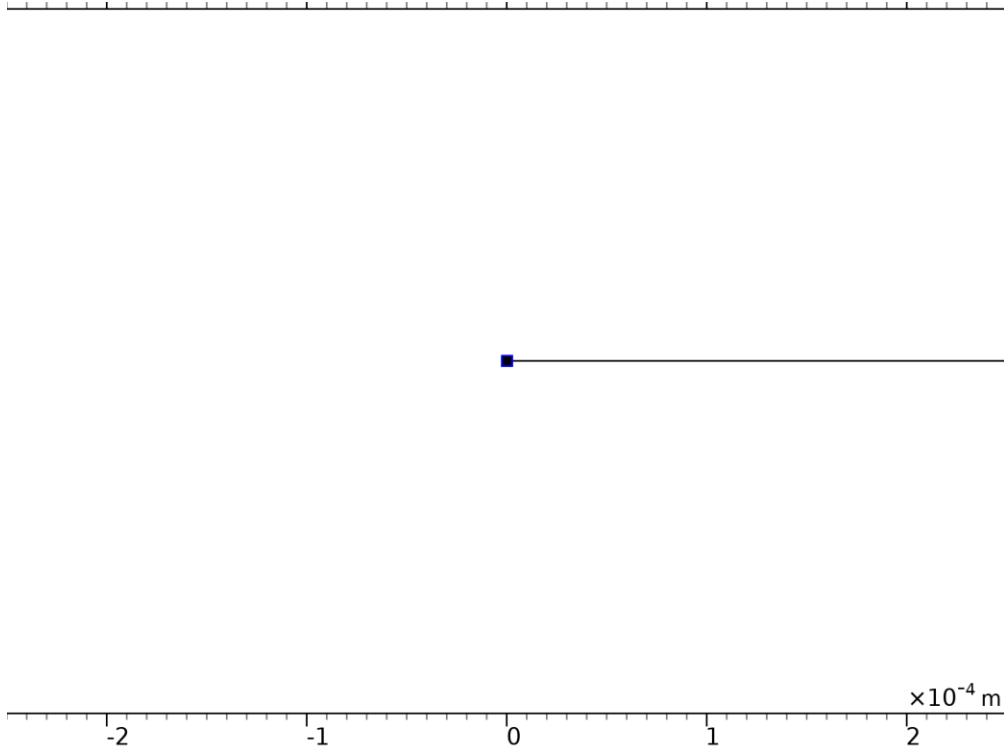

*Selection*

**PET coupling**

|               |             |
|---------------|-------------|
| Coupling type | Integration |
| Operator name | intop2      |

**SELECTION**

|                        |                                         |
|------------------------|-----------------------------------------|
| Geometric entity level | Boundary                                |
| Selection              | Geometry geom1: Dimension 0: Boundary 3 |

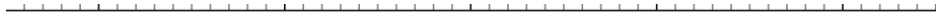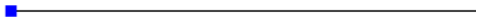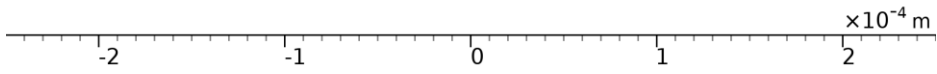

*Selection*

## 2.2 GEOMETRY 1

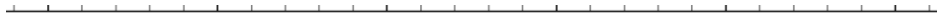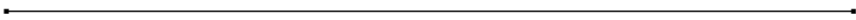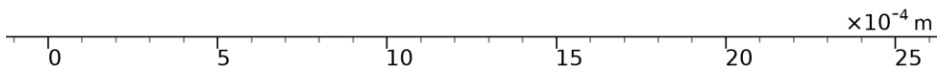

*Geometry 1*

UNITS

|             |   |
|-------------|---|
| Length unit | m |
|-------------|---|

|              |     |
|--------------|-----|
| Angular unit | deg |
|--------------|-----|

#### GEOMETRY STATISTICS

| Description          | Value |
|----------------------|-------|
| Space dimension      | 1     |
| Number of domains    | 3     |
| Number of boundaries | 4     |

### 2.2.1 Interval 1 (i1)

#### INTERVAL

| Coordinates (m) |
|-----------------|
| 0               |
| L               |

### 2.2.2 Point 1 (pt1)

#### POINT

| Description      | Value   |
|------------------|---------|
| Point coordinate | 5.9E-10 |

### 2.2.3 Point 2 (pt2)

#### POINT

| Description      | Value   |
|------------------|---------|
| Point coordinate | 2.9E-10 |

## 2.3 TRANSPORT OF DILUTED SPECIES

#### USED PRODUCTS

|                                      |
|--------------------------------------|
| COMSOL Multiphysics                  |
| Chemical Reaction Engineering Module |



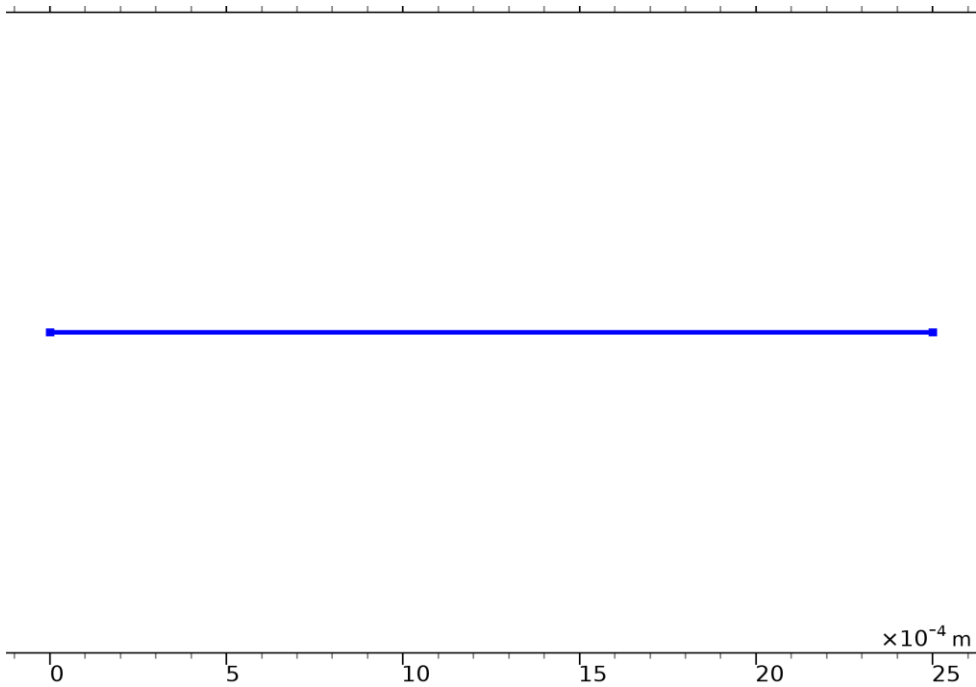

*Transport of Diluted Species*

#### SELECTION

|                        |                                       |
|------------------------|---------------------------------------|
| Geometric entity level | Domain                                |
| Selection              | Geometry geom1: Dimension 1: Domain 3 |

#### EQUATIONS

$$\frac{\partial c_i}{\partial t} + \nabla \cdot \mathbf{J}_i = R_i$$

$$\mathbf{J}_i = -D_i \nabla c_i - z_i \mu_{mj} F c_i \nabla V$$

### 2.3.1 Interface Settings

#### Discretization

##### SETTINGS

| Description                                          | Value  |
|------------------------------------------------------|--------|
| Concentration                                        | Linear |
| Compute boundary fluxes                              | On     |
| Apply smoothing to boundary fluxes                   | On     |
| Value type when using splitting of complex variables | Real   |

#### Transport Mechanisms

##### SETTINGS

| Description                   | Value |
|-------------------------------|-------|
| Convection                    | Off   |
| Migration in electric field   | On    |
| Mass transfer in porous media | Off   |

### Advanced Settings

#### SETTINGS

| Description     | Value                |
|-----------------|----------------------|
| Convective term | Nonconservative form |

### 2.3.2 Transport Properties 1

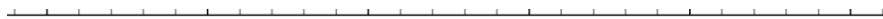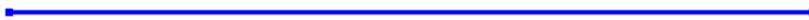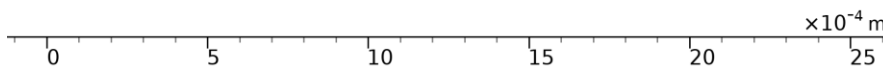

#### Transport Properties 1

#### SELECTION

|                        |                                          |
|------------------------|------------------------------------------|
| Geometric entity level | Domain                                   |
| Selection              | Geometry geom1: Dimension 1: All domains |

#### EQUATIONS

$$\nabla \cdot \mathbf{J}_i = R_i$$

.....

$$\mathbf{J}_i = -D_i \nabla C_i - z_i \mu_{mj} F C_i \nabla V$$

### Diffusion

#### SETTINGS

| Description           | Value                                                  |
|-----------------------|--------------------------------------------------------|
| Source                | Material                                               |
| Material              | None                                                   |
| Diffusion coefficient | User defined                                           |
| Diffusion coefficient | {{D_Cation, 0, 0}, {0, D_Cation, 0}, {0, 0, D_Cation}} |
| Diffusion coefficient | User defined                                           |
| Diffusion coefficient | {{D_Anion, 0, 0}, {0, D_Anion, 0}, {0, 0, D_Anion}}    |

### Migration in Electric Field

#### SETTINGS

| Description        | Value                      |
|--------------------|----------------------------|
| Electric potential | Electric potential (es)    |
| Mobility           | Nernst - Einstein relation |
| Charge number      | {z_Cation, z_Anion}        |

### Coordinate System Selection

#### SETTINGS

| Description       | Value                    |
|-------------------|--------------------------|
| Coordinate system | Global coordinate system |

### Model Input

#### SETTINGS

| Description | Value        |
|-------------|--------------|
| Temperature | User defined |
| Temperature | T            |

### 2.3.3 No Flux 1

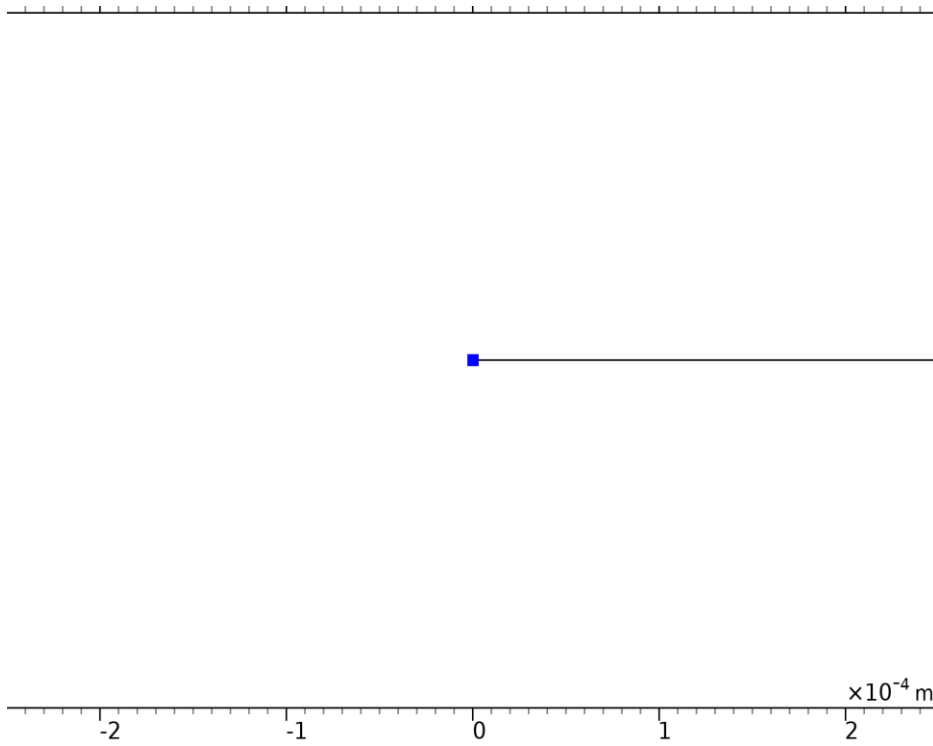

*No Flux 1*

#### SELECTION

|                        |                                             |
|------------------------|---------------------------------------------|
| Geometric entity level | Boundary                                    |
| Selection              | Geometry geom1: Dimension 0: All boundaries |

#### EQUATIONS

$$-\mathbf{n} \cdot \mathbf{J}_i = 0$$

## 2.3.4 Initial Values 1

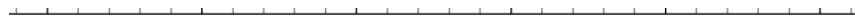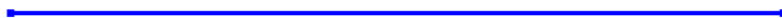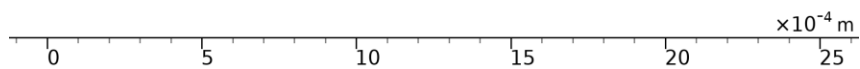

*Initial Values 1*

### SELECTION

|                        |                                          |
|------------------------|------------------------------------------|
| Geometric entity level | Domain                                   |
| Selection              | Geometry geom1: Dimension 1: All domains |

### Initial Values

#### SETTINGS

| Description   | Value                 |
|---------------|-----------------------|
| Concentration | {cCation_b, cAnion_b} |

### 2.3.5 Concentration on bulk boundary

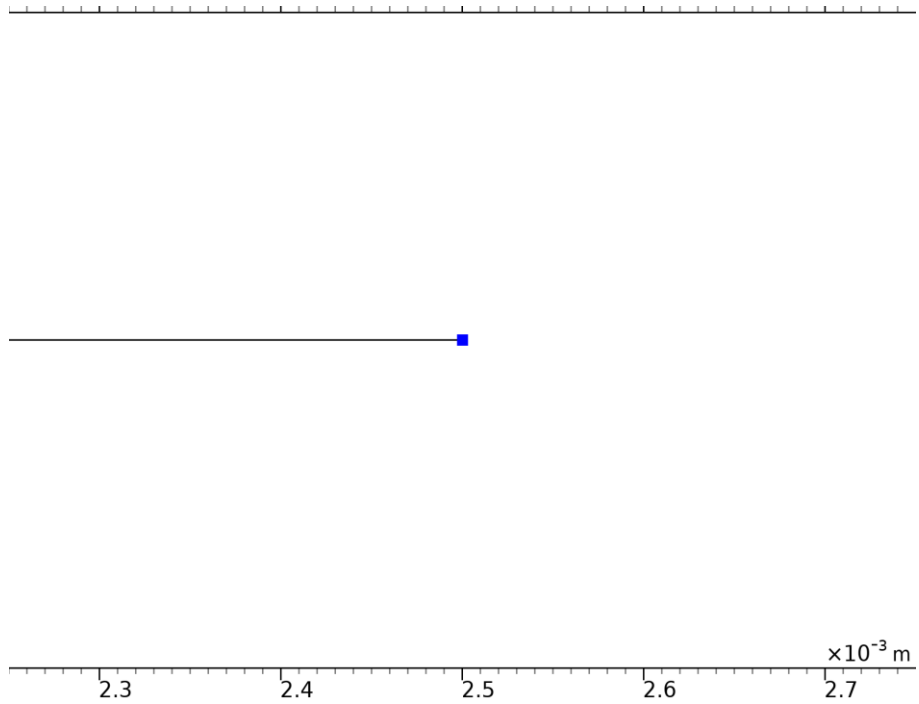

Concentration on bulk boundary

#### SELECTION

|                        |                                         |
|------------------------|-----------------------------------------|
| Geometric entity level | Boundary                                |
| Selection              | Geometry geom1: Dimension 0: Boundary 4 |

#### EQUATIONS

$$c_i = c_{0j}$$

#### Concentration

##### SETTINGS

| Description     | Value                 |
|-----------------|-----------------------|
| Species cCation | On                    |
| Species cAnion  | On                    |
| Concentration   | {cCation_b, cAnion_b} |

## 2.4 TRANSPORT OF DILUTED SPECIES 2

#### USED PRODUCTS

|                                      |
|--------------------------------------|
| COMSOL Multiphysics                  |
| Chemical Reaction Engineering Module |

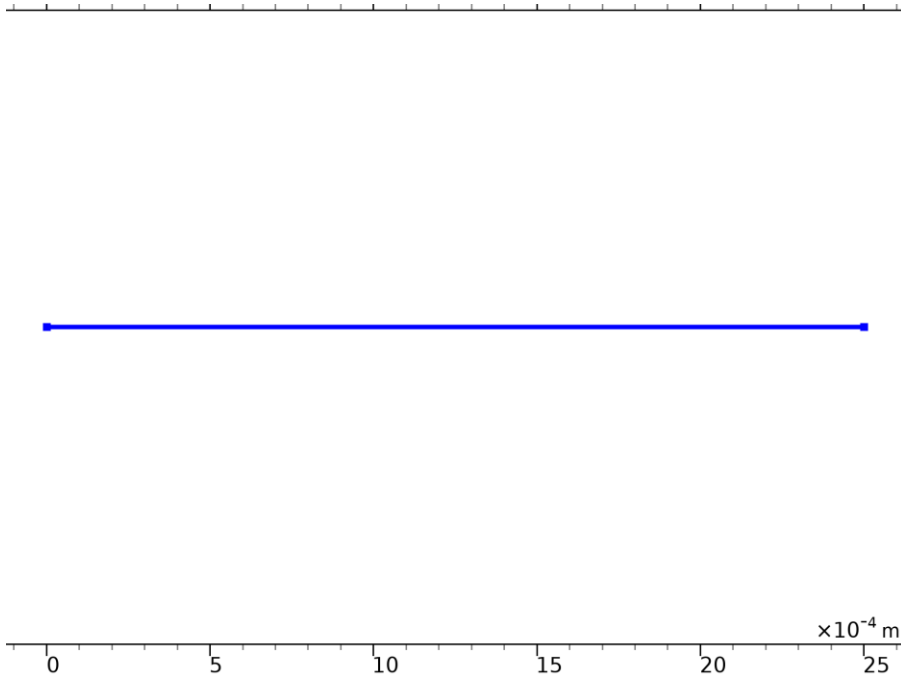

*Transport of Diluted Species 2*

#### SELECTION

|                        |                                       |
|------------------------|---------------------------------------|
| Geometric entity level | Domain                                |
| Selection              | Geometry geom1: Dimension 1: Domain 3 |

#### EQUATIONS

$$\nabla \cdot \mathbf{J}_i = R_i$$

$$\mathbf{J}_i = -D_i \nabla C_i - z_i \mu_{mj} F C_i \nabla V$$

## 2.4.1 Interface Settings

### Discretization

#### SETTINGS

| Description                                          | Value  |
|------------------------------------------------------|--------|
| Concentration                                        | Linear |
| Compute boundary fluxes                              | On     |
| Apply smoothing to boundary fluxes                   | On     |
| Value type when using splitting of complex variables | Real   |

### Transport Mechanisms

#### SETTINGS

| Description | Value |
|-------------|-------|
| Convection  | Off   |

| Description                   | Value |
|-------------------------------|-------|
| Migration in electric field   | On    |
| Mass transfer in porous media | Off   |

### Advanced Settings

#### SETTINGS

| Description     | Value                |
|-----------------|----------------------|
| Convective term | Nonconservative form |

## 2.4.2 Transport Properties 1

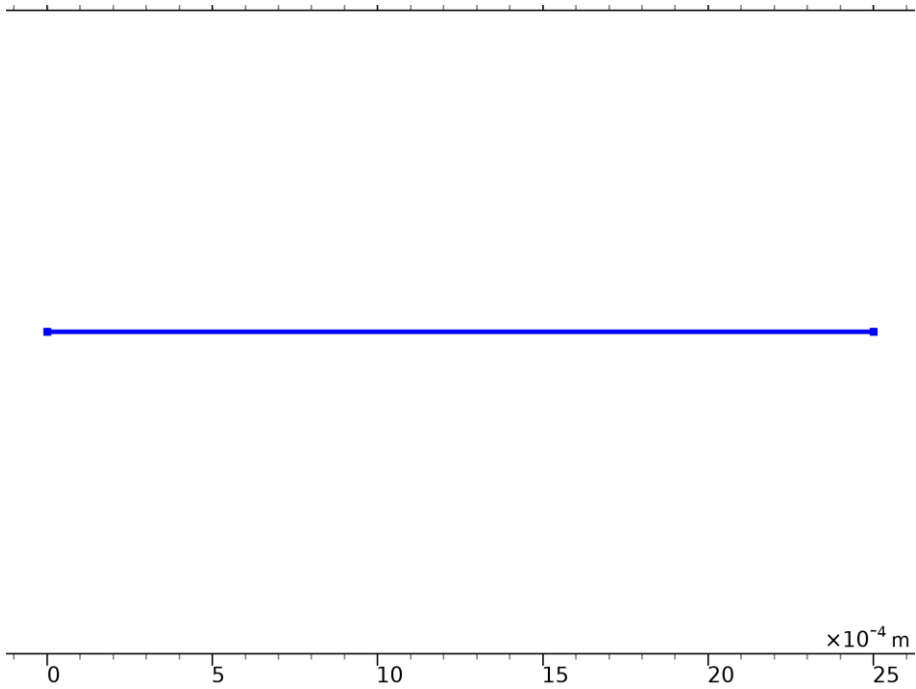

### Transport Properties 1

#### SELECTION

|                        |                                          |
|------------------------|------------------------------------------|
| Geometric entity level | Domain                                   |
| Selection              | Geometry geom1: Dimension 1: All domains |

#### EQUATIONS

$$\begin{aligned} \nabla \cdot \mathbf{J}_i &= R_i \\ \dots \\ \mathbf{J}_i &= -D_i \nabla C_i - z_i \mu_{mj} F C_i \nabla V \end{aligned}$$

### Diffusion

#### SETTINGS



| Description           | Value                                         |
|-----------------------|-----------------------------------------------|
| Source                | Material                                      |
| Material              | None                                          |
| Diffusion coefficient | User defined                                  |
| Diffusion coefficient | {{DcOx, 0, 0}, {0, DcOx, 0}, {0, 0, DcOx}}    |
| Diffusion coefficient | User defined                                  |
| Diffusion coefficient | {{DcRed, 0, 0}, {0, DcRed, 0}, {0, 0, DcRed}} |

## Migration in Electric Field

### SETTINGS

| Description        | Value                      |
|--------------------|----------------------------|
| Electric potential | Electric potential (es)    |
| Mobility           | Nernst - Einstein relation |
| Charge number      | {z_Ox_diff, z_Red_diff}    |

## Coordinate System Selection

### SETTINGS

| Description       | Value                    |
|-------------------|--------------------------|
| Coordinate system | Global coordinate system |

## Model Input

### SETTINGS

| Description | Value        |
|-------------|--------------|
| Temperature | User defined |
| Temperature | T            |

### 2.4.3 No Flux 1

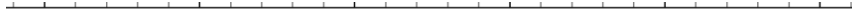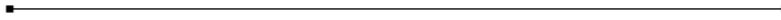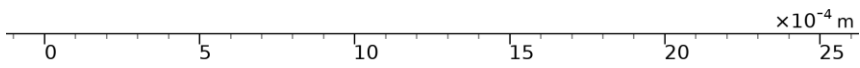

*No Flux 1*

#### SELECTION

|                        |                                             |
|------------------------|---------------------------------------------|
| Geometric entity level | Boundary                                    |
| Selection              | Geometry geom1: Dimension 0: All boundaries |

#### EQUATIONS

$$-\mathbf{n} \cdot \mathbf{J}_i = 0$$

## 2.4.4 Initial Values 1

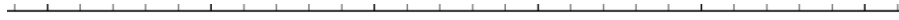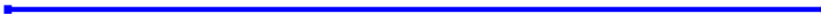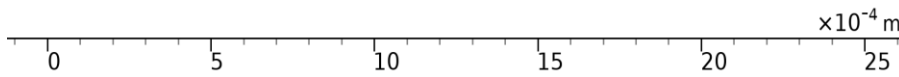

*Initial Values 1*

### SELECTION

|                        |                                          |
|------------------------|------------------------------------------|
| Geometric entity level | Domain                                   |
| Selection              | Geometry geom1: Dimension 1: All domains |

### Initial Values

#### SETTINGS

| Description   | Value         |
|---------------|---------------|
| Concentration | {cOx0_dif, 0} |

## 2.4.5 Concentration 1

---

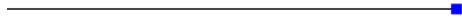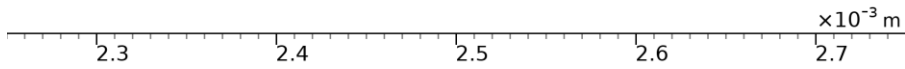

Concentration 1

### SELECTION

|                        |                                         |
|------------------------|-----------------------------------------|
| Geometric entity level | Boundary                                |
| Selection              | Geometry geom1: Dimension 0: Boundary 4 |

### EQUATIONS

$$c_i = c_{0j}$$

.....

### Concentration

#### SETTINGS

| Description   | Value         |
|---------------|---------------|
| Species cOx   | On            |
| Species cRed  | On            |
| Concentration | {cOx0_dif, 0} |

## 2.4.6 Butler Volmer HET

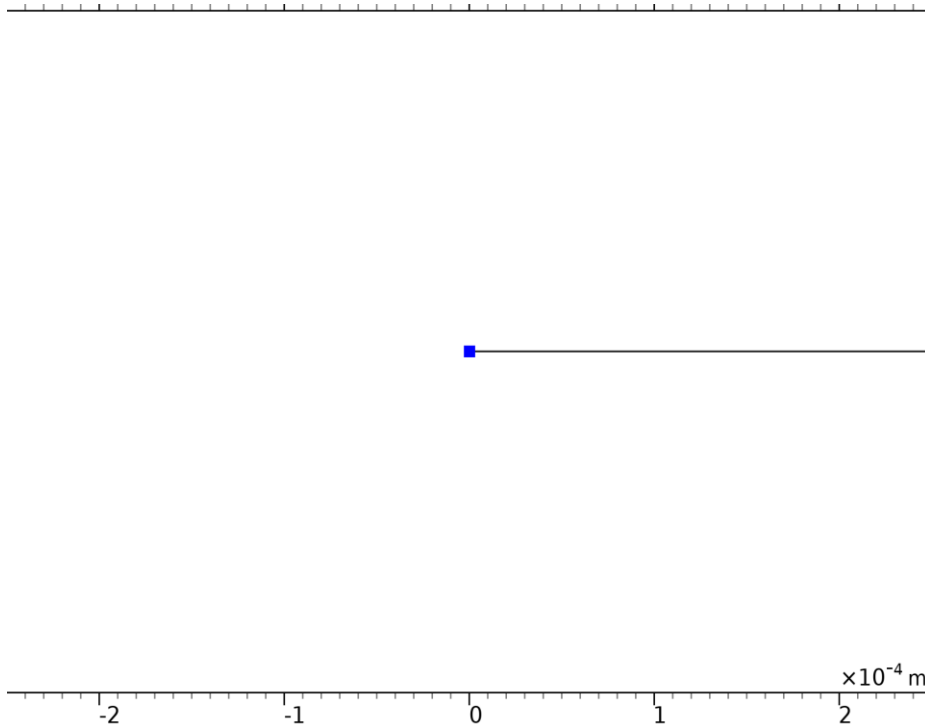

Butler Volmer HET

### SELECTION

|                        |                                         |
|------------------------|-----------------------------------------|
| Geometric entity level | Boundary                                |
| Selection              | Geometry geom1: Dimension 0: Boundary 3 |

### EQUATIONS

$$-\mathbf{n} \cdot \mathbf{J}_j = J_{0,j}$$

### Inward Flux

#### SETTINGS

| Description  | Value                                     |
|--------------|-------------------------------------------|
| Flux type    | General inward flux                       |
| Species cOx  | On                                        |
| Species cRed | On                                        |
|              | {-kf*cOx + kb*cRed, -(-kf*cOx + kb*cRed)} |

### Weak Expressions

| Weak expression                   | Integration order | Integration frame | Selection  |
|-----------------------------------|-------------------|-------------------|------------|
| $(-kf*cOx + kb*cRed)*test(cOx)$   | 2                 | Spatial           | Boundary 3 |
| $-(-kf*cOx + kb*cRed)*test(cRed)$ | 2                 | Spatial           | Boundary 3 |

## 2.5 ELECTROSTATICS

### USED PRODUCTS

COMSOL Multiphysics

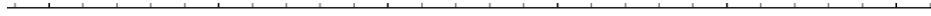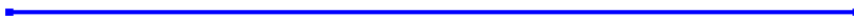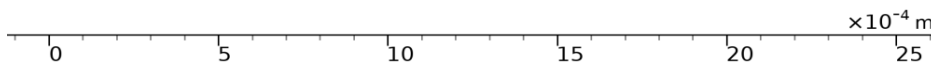

*Electrostatics*

### SELECTION

|                        |                                          |
|------------------------|------------------------------------------|
| Geometric entity level | Domain                                   |
| Selection              | Geometry geom1: Dimension 1: All domains |

### EQUATIONS

$$\nabla \cdot \mathbf{D} = \rho_v$$

$$\mathbf{E} = -\nabla V$$

### 2.5.1 Interface Settings

#### Discretization

##### SETTINGS

| Description                                          | Value   |
|------------------------------------------------------|---------|
| Electric potential                                   | Linear  |
| Value type when using splitting of complex variables | Complex |

#### Manual Terminal Sweep Settings

##### SETTINGS

| Description               | Value   |
|---------------------------|---------|
| Use manual terminal sweep | Off     |
| Reference impedance       | 50[ohm] |

## 2.5.2 Charge Conservation - Inner Film

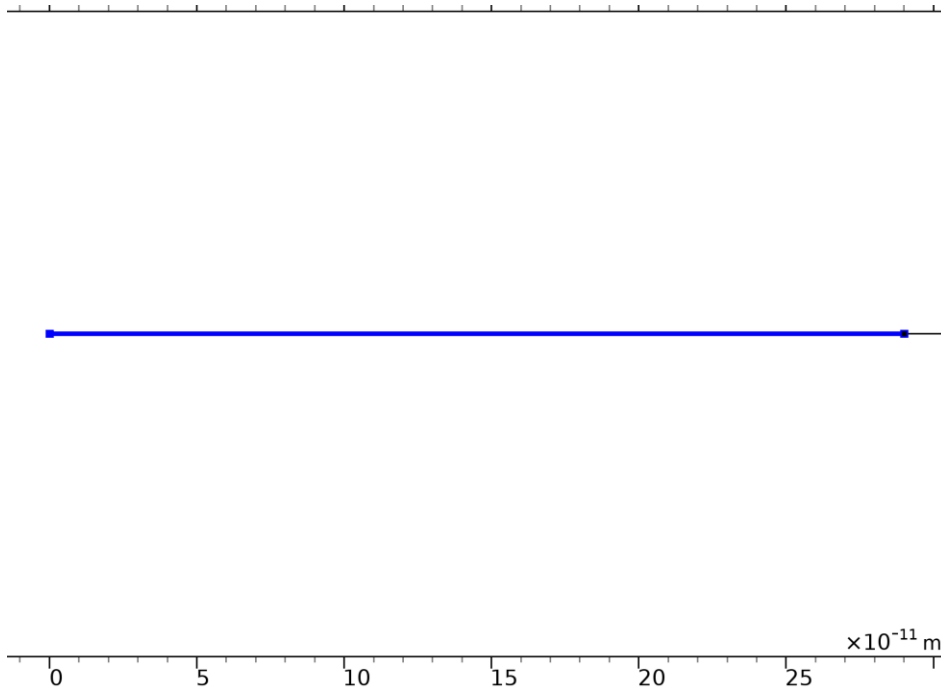

Charge Conservation - Inner Film

### SELECTION

|                        |                                          |
|------------------------|------------------------------------------|
| Geometric entity level | Domain                                   |
| Selection              | Geometry geom1: Dimension 1: All domains |

### EQUATIONS

$$\mathbf{E} = -\nabla V$$

$$\nabla \cdot (\epsilon_0 \epsilon_r \mathbf{E}) = \rho_v$$

.....

### Constitutive Relation D-E

#### SETTINGS

| Description           | Value                                                     |
|-----------------------|-----------------------------------------------------------|
| Dielectric model      | Relative permittivity                                     |
| Relative permittivity | User defined                                              |
| Relative permittivity | {{epsilon_1, 0, 0}, {0, epsilon_1, 0}, {0, 0, epsilon_1}} |

## Coordinate System Selection

### SETTINGS

| Description       | Value                    |
|-------------------|--------------------------|
| Coordinate system | Global coordinate system |

## Model Input

### SETTINGS

| Description | Value        |
|-------------|--------------|
| Temperature | User defined |
| Temperature | T            |

## 2.5.3 Zero Charge 1

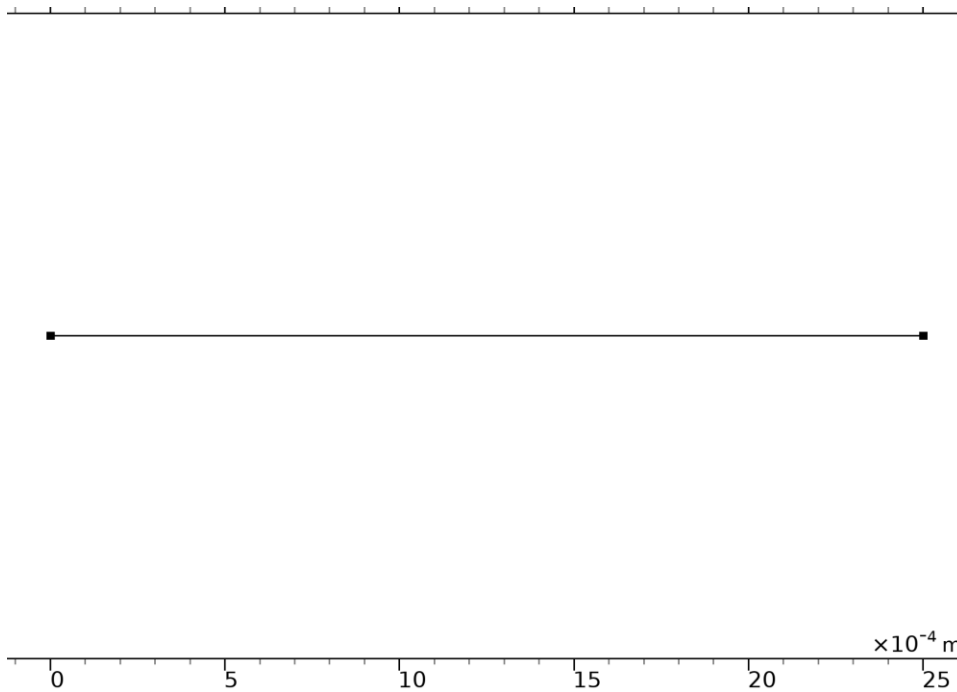

### Zero Charge 1

#### SELECTION

|                        |                                             |
|------------------------|---------------------------------------------|
| Geometric entity level | Boundary                                    |
| Selection              | Geometry geom1: Dimension 0: All boundaries |

#### EQUATIONS

$$\mathbf{n} \cdot \mathbf{D} = 0$$



## 2.5.4 Initial Values 1

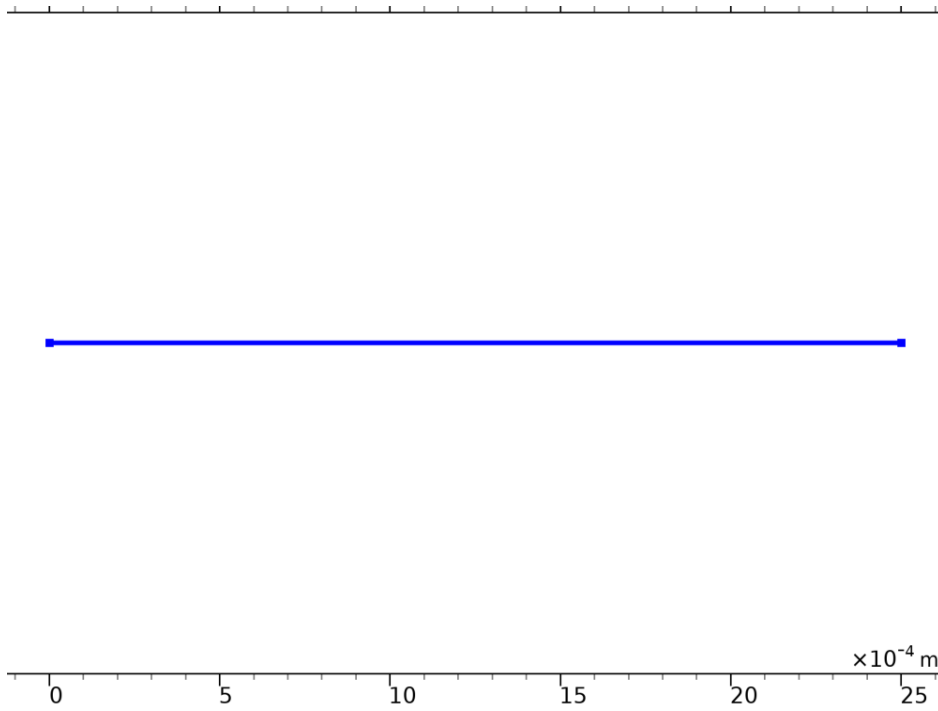

*Initial Values 1*

### SELECTION

|                        |                                          |
|------------------------|------------------------------------------|
| Geometric entity level | Domain                                   |
| Selection              | Geometry geom1: Dimension 1: All domains |

### SETTINGS

| Description        | Value |
|--------------------|-------|
| Electric potential | 0     |

## 2.5.5 Charge Conservation - Solution

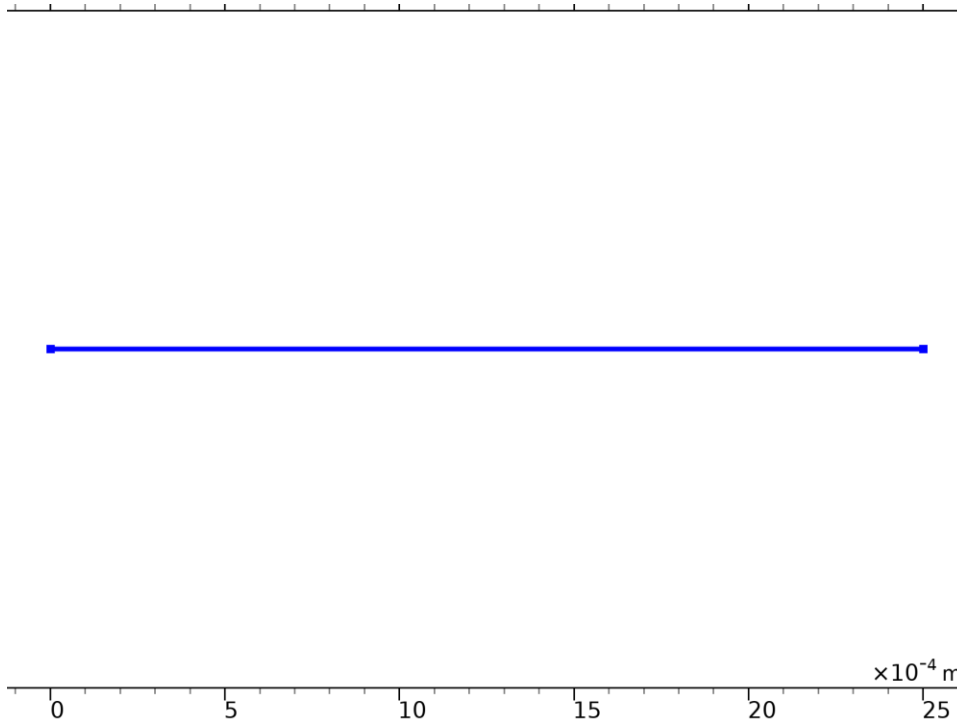

Charge Conservation - Solution

### SELECTION

|                        |                                       |
|------------------------|---------------------------------------|
| Geometric entity level | Domain                                |
| Selection              | Geometry geom1: Dimension 1: Domain 3 |

### EQUATIONS

$$\mathbf{E} = -\nabla V$$

$$\nabla \cdot (\epsilon_0 \epsilon_r \mathbf{E}) = \rho_v$$

### Constitutive Relation D-E

#### SETTINGS

| Description           | Value                                                     |
|-----------------------|-----------------------------------------------------------|
| Dielectric model      | Relative permittivity                                     |
| Relative permittivity | User defined                                              |
| Relative permittivity | {{epsilon_s, 0, 0}, {0, epsilon_s, 0}, {0, 0, epsilon_s}} |

### Coordinate System Selection

#### SETTINGS

| Description       | Value                    |
|-------------------|--------------------------|
| Coordinate system | Global coordinate system |

## Model Input

### SETTINGS

| Description | Value        |
|-------------|--------------|
| Temperature | User defined |
| Temperature | T            |

## 2.5.6 Ground – Ag/AgCl reference

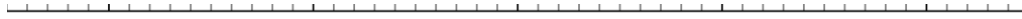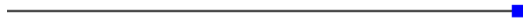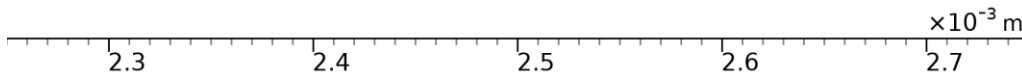

*Ground - Ag|AgCl reference*

### SELECTION

|                        |                                         |
|------------------------|-----------------------------------------|
| Geometric entity level | Boundary                                |
| Selection              | Geometry geom1: Dimension 0: Boundary 4 |

### EQUATIONS

$$V = 0$$

## 2.5.7 Electric Potential - Time Dependent

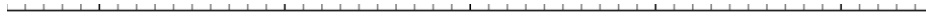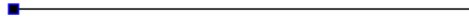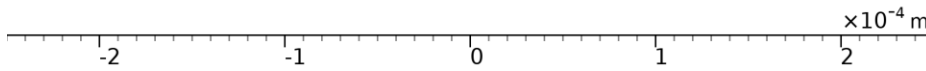

*Electric Potential - Time Dependent*

### SELECTION

|                        |                                         |
|------------------------|-----------------------------------------|
| Geometric entity level | Boundary                                |
| Selection              | Geometry geom1: Dimension 0: Boundary 1 |

### EQUATIONS

$$V = V_0$$

.....

### Electric Potential

#### SETTINGS

| Description        | Value              |
|--------------------|--------------------|
| Electric potential | CorrectedPotential |

## 2.5.8 Space Charge Density - Multiphysics Coupling

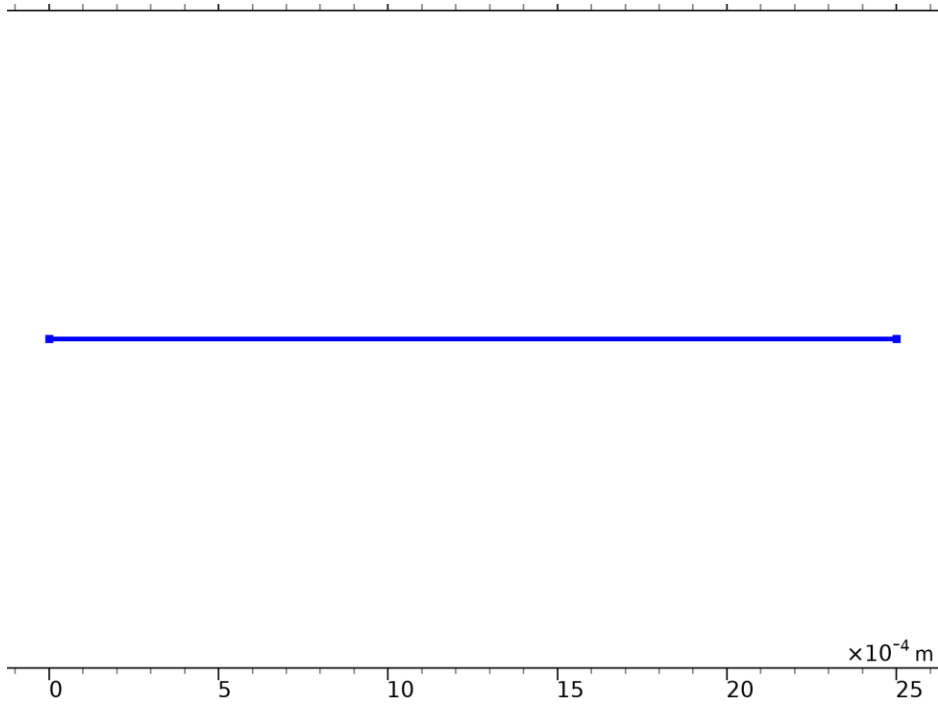

*Space Charge Density - Multiphysics Coupling*

### SELECTION

|                        |                                       |
|------------------------|---------------------------------------|
| Geometric entity level | Domain                                |
| Selection              | Geometry geom1: Dimension 1: Domain 3 |

### EQUATIONS

$$\nabla \cdot \mathbf{D} = \rho_v$$

### Coordinate System Selection

#### SETTINGS

| Description       | Value                    |
|-------------------|--------------------------|
| Coordinate system | Global coordinate system |

## 2.5.9 Charge Conservation - Solution 1

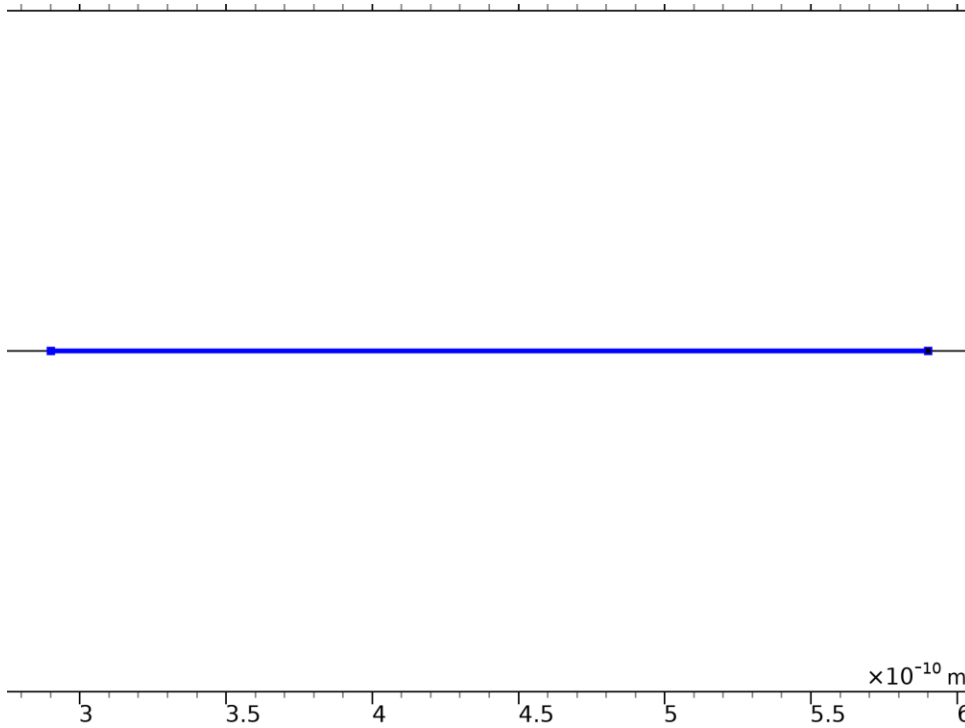

Charge Conservation - Solution 1

### SELECTION

|                        |                                       |
|------------------------|---------------------------------------|
| Geometric entity level | Domain                                |
| Selection              | Geometry geom1: Dimension 1: Domain 2 |

### EQUATIONS

$$\mathbf{E} = -\nabla V$$

$$\nabla \cdot (\epsilon_0 \epsilon_r \mathbf{E}) = \rho_v$$

### Constitutive Relation D-E

#### SETTINGS

| Description           | Value                                                     |
|-----------------------|-----------------------------------------------------------|
| Dielectric model      | Relative permittivity                                     |
| Relative permittivity | User defined                                              |
| Relative permittivity | {{epsilon_2, 0, 0}, {0, epsilon_2, 0}, {0, 0, epsilon_2}} |

### Coordinate System Selection

#### SETTINGS

| Description       | Value                    |
|-------------------|--------------------------|
| Coordinate system | Global coordinate system |

## Model Input

### SETTINGS

| Description | Value        |
|-------------|--------------|
| Temperature | User defined |
| Temperature | T            |

## 2.6 MESH 1

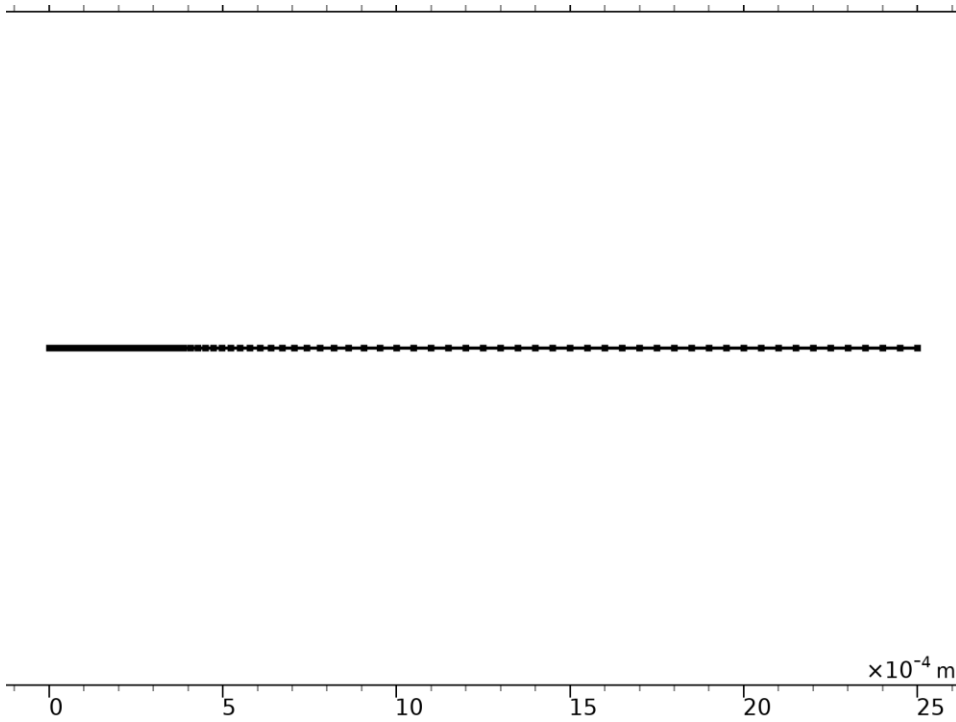

Mesh 1

### 2.6.1 Size (size)

#### SETTINGS

| Description                 | Value  |
|-----------------------------|--------|
| Maximum element size        | L/50   |
| Minimum element size        | 3.0E-8 |
| Curvature factor            | 0.3    |
| Maximum element growth rate | 1.3    |
| Custom element size         | Custom |

### 2.6.2 Size 1 (size1)

#### SELECTION

|                        |          |
|------------------------|----------|
| Geometric entity level | Boundary |
|------------------------|----------|

|           |                                         |
|-----------|-----------------------------------------|
| Selection | Geometry geom1: Dimension 0: Boundary 3 |
|-----------|-----------------------------------------|

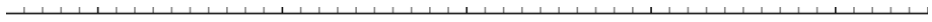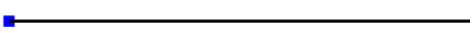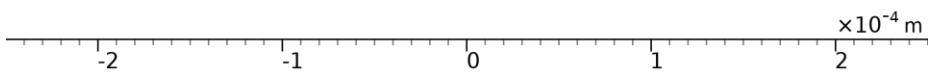

Size 1

SETTINGS

| Description                  | Value          |
|------------------------------|----------------|
| Maximum element size         | DebyeLength/20 |
| Minimum element size         | 3.0E-8         |
| Minimum element size         | Off            |
| Curvature factor             | 0.3            |
| Curvature factor             | Off            |
| Resolution of narrow regions | Off            |
| Maximum element growth rate  | 1.05           |
| Custom element size          | Custom         |

2.6.3 Size 2 (size2)

SELECTION

|                        |                                          |
|------------------------|------------------------------------------|
| Geometric entity level | Domain                                   |
| Selection              | Geometry geom1: Dimension 1: Domains 1-2 |



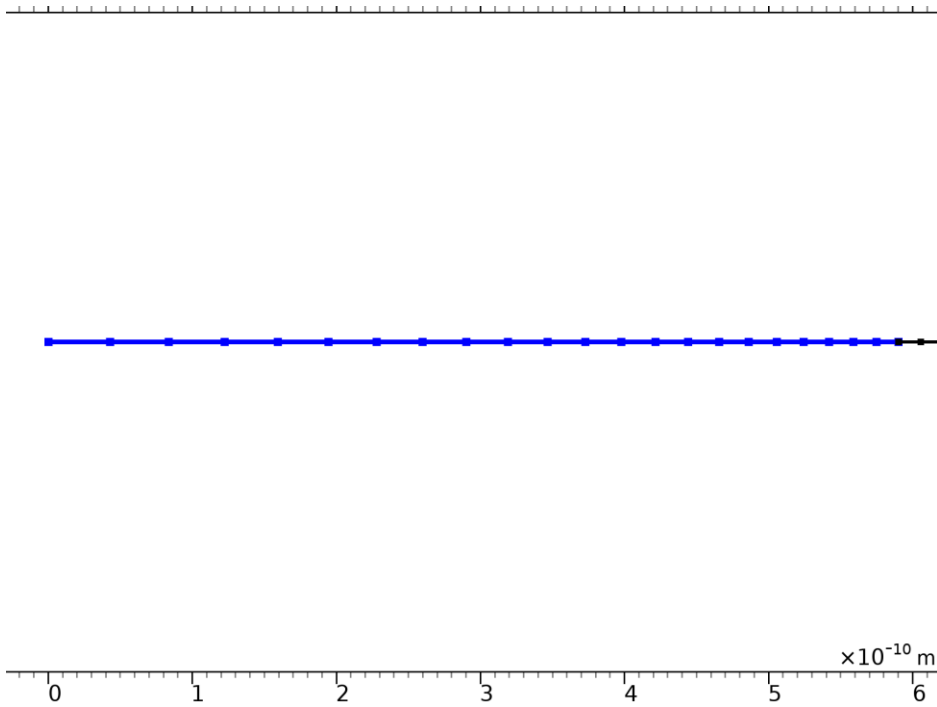

Size 2

#### SETTINGS

| Description                  | Value  |
|------------------------------|--------|
| Maximum element size         | 1E-10  |
| Minimum element size         | 3.0E-8 |
| Minimum element size         | Off    |
| Curvature factor             | 0.3    |
| Curvature factor             | Off    |
| Resolution of narrow regions | Off    |
| Maximum element growth rate  | 1.05   |
| Custom element size          | Custom |

### 2.6.4 Edge 1 (edg1)

#### SELECTION

|                        |                                          |
|------------------------|------------------------------------------|
| Geometric entity level | Domain                                   |
| Selection              | Geometry geom1: Dimension 1: Domains 1-3 |

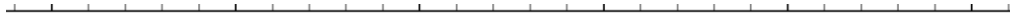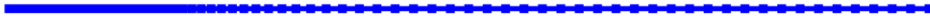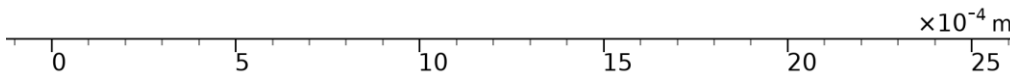

*Edge 1*

## 3 Component (IR drop compensation)

### SETTINGS

| Description | Value                      |
|-------------|----------------------------|
| Unit system | Same as global system (SI) |

### 3.1 DEFINITIONS

#### 3.1.1 Probes

##### Ohmic drop (from gain) probe

|            |                       |
|------------|-----------------------|
| Probe type | Global variable probe |
|------------|-----------------------|

### EXPRESSION

| Description         | Value                                      |
|---------------------|--------------------------------------------|
| Expression          | IR                                         |
| Table and plot unit | V                                          |
| Description         | Ohmic drop as determined by 'gain circuit' |

### TABLE AND WINDOW SETTINGS

| Description  | Value        |
|--------------|--------------|
| Output table | Probe Table  |
| Plot window  | Probe Plot 3 |

### 3.2 GLOBAL ODES AND DAES

#### USED PRODUCTS

|                     |
|---------------------|
| COMSOL Multiphysics |
|---------------------|

#### SELECTION

|                        |              |
|------------------------|--------------|
| Geometric entity level | Entire model |
|------------------------|--------------|

#### 3.2.1 Global Equations

##### SELECTION

|                        |              |
|------------------------|--------------|
| Geometric entity level | Entire model |
|------------------------|--------------|

## Global Equations

| Name | f(u,ut,utt,t)                                                                 | Initial value (u_0) | Initial value (u_t0) | Description                                |
|------|-------------------------------------------------------------------------------|---------------------|----------------------|--------------------------------------------|
| IR   | $IRt + \text{Gain}[1/s] * (IR - \text{comp1.CurrentTot} * \text{Resistance})$ | 0                   | 0                    | Ohmic drop as determined by 'gain circuit' |

## Discretization

### SETTINGS

| Description                                          | Value   |
|------------------------------------------------------|---------|
| Value type when using splitting of complex variables | Complex |

## Units

| Dependent variable quantity | Unit |
|-----------------------------|------|
| Custom unit                 | V    |

| Source term quantity | Unit |
|----------------------|------|
| Custom unit          | V/s  |

## Shape functions

| Name | Shape function | Unit | Description                                | Shape frame | Selection |
|------|----------------|------|--------------------------------------------|-------------|-----------|
| IR   | ODE            | V    | Ohmic drop as determined by 'gain circuit' |             | Global    |

## 4 Study (time-dependent)

### COMPUTATION INFORMATION

|                  |           |
|------------------|-----------|
| Computation time | 1 min 4 s |
|------------------|-----------|

### 4.1 PARAMETRIC SWEEP

| Parameter name        | Parameter value list | Parameter unit |
|-----------------------|----------------------|----------------|
| z_Red_diff            | +2                   |                |
| z_Ox_diff             | +3                   |                |
| OhmicDropCompensation | 0.95                 | 1              |

### STUDY SETTINGS

| Description    | Value                                          |
|----------------|------------------------------------------------|
| Sweep type     | All combinations                               |
| Parameter name | {z_Red_diff, z_Ox_diff, OhmicDropCompensation} |
| Unit           | { , 1}                                         |

### PARAMETERS

| Parameter name                                                                     | Parameter value list | Parameter unit |
|------------------------------------------------------------------------------------|----------------------|----------------|
| z_Red_diff                                                                         | +2                   |                |
| z_Ox_diff                                                                          | +3                   |                |
| OhmicDropCompensation (Amount of ohmic drop that is attempted to be corrected for) | 0.95                 | 1              |

### 4.2 STATIONARY

#### STUDY SETTINGS

| Description                    | Value |
|--------------------------------|-------|
| Include geometric nonlinearity | Off   |

#### VALUES OF DEPENDENT VARIABLES

| Description | Value           |
|-------------|-----------------|
| Settings    | User controlled |

#### PHYSICS AND VARIABLES SELECTION

| Physics interface                     | Discretization |
|---------------------------------------|----------------|
| Transport of Diluted Species (tds)    | physics        |
| Transport of Diluted Species 2 (tds2) | physics        |
| Electrostatics (es)                   | physics        |

#### MESH SELECTION

| Geometry           | Mesh  |
|--------------------|-------|
| Geometry 1 (geom1) | mesh1 |

### 4.3 TIME DEPENDENT

| Times                                                      | Unit |
|------------------------------------------------------------|------|
| range(0, sampling_time, 2*Segment_Duration+Start_Duration) | s    |

#### STUDY SETTINGS

| Description                    | Value |
|--------------------------------|-------|
| Include geometric nonlinearity | Off   |

#### PHYSICS AND VARIABLES SELECTION

| Physics interface                     | Discretization |
|---------------------------------------|----------------|
| Transport of Diluted Species (tds)    | physics        |
| Transport of Diluted Species 2 (tds2) | physics        |
| Electrostatics (es)                   | physics        |
| Events (ev)                           | physics        |
| Global ODEs and DAEs (ge)             | physics        |

#### MESH SELECTION

| Geometry           | Mesh  |
|--------------------|-------|
| Geometry 1 (geom1) | mesh1 |

### 4.4 SOLVER CONFIGURATIONS

#### 4.4.1 Solution 2

##### Compile Equations: Stationary (st1)

#### STUDY AND STEP

| Description    | Value                                  |
|----------------|----------------------------------------|
| Use study      | <a href="#">Study (time-dependent)</a> |
| Use study step | <a href="#">Stationary</a>             |

##### Dependent Variables 1 (v1)

#### GENERAL

| Description           | Value                      |
|-----------------------|----------------------------|
| Defined by study step | <a href="#">Stationary</a> |

#### INITIAL VALUE CALCULATION CONSTANTS

| Constant name | Initial value source |
|---------------|----------------------|
| timestep      | 1.3E-6[s]            |

**Concentration (comp1.cAnion) (comp1\_cAnion)**

GENERAL

| Description        | Value                                    |
|--------------------|------------------------------------------|
| Field components   | comp1.cAnion                             |
| Internal variables | {comp1.uflux.cAnion, comp1.dflux.cAnion} |

**Concentration (comp1.cCation) (comp1\_cCation)**

GENERAL

| Description        | Value                                      |
|--------------------|--------------------------------------------|
| Field components   | comp1.cCation                              |
| Internal variables | {comp1.uflux.cCation, comp1.dflux.cCation} |

**Concentration (comp1.cOx) (comp1\_cOx)**

GENERAL

| Description        | Value                              |
|--------------------|------------------------------------|
| Field components   | comp1.cOx                          |
| Internal variables | {comp1.uflux.cOx, comp1.dflux.cOx} |

**Concentration (comp1.cRed) (comp1\_cRed)**

GENERAL

| Description        | Value                                |
|--------------------|--------------------------------------|
| Field components   | comp1.cRed                           |
| Internal variables | {comp1.uflux.cRed, comp1.dflux.cRed} |

**Electric potential (comp1.Phi) (comp1\_Phi)**

GENERAL

| Description      | Value     |
|------------------|-----------|
| Field components | comp1.Phi |

**Ohmic drop as determined by 'gain circuit' (comp2.ODE1) (comp2\_ODE1)**

GENERAL

| Description          | Value    |
|----------------------|----------|
| State components     | comp2.IR |
| Solve for this state | Off      |

## Stationary Solver 1 (s1)

### GENERAL

| Description           | Value                      |
|-----------------------|----------------------------|
| Defined by study step | <a href="#">Stationary</a> |
| Relative tolerance    | 1E-4                       |

### RESULTS WHILE SOLVING

| Description | Value |
|-------------|-------|
| Probes      | None  |

## Advanced (aDef)

### ASSEMBLY SETTINGS

| Description            | Value |
|------------------------|-------|
| Reuse sparsity pattern | On    |

## Fully Coupled 1 (fc1)

### GENERAL

| Description   | Value                    |
|---------------|--------------------------|
| Linear solver | <a href="#">Direct 1</a> |

### METHOD AND TERMINATION

| Description                  | Value  |
|------------------------------|--------|
| Initial damping factor       | 0.01   |
| Minimum damping factor       | 1.0E-6 |
| Maximum number of iterations | 50     |

## Direct 1 (d1)

### GENERAL

| Description           | Value   |
|-----------------------|---------|
| Solver                | PARDISO |
| Pivoting perturbation | 1.0E-13 |

## Solution Store 1 (su1)

### GENERAL

| Description | Value            |
|-------------|------------------|
| Solution    | Solution Store 1 |

## Compile Equations: Time Dependent (st2)

### STUDY AND STEP



| Description    | Value                                  |
|----------------|----------------------------------------|
| Use study      | <a href="#">Study (time-dependent)</a> |
| Use study step | <a href="#">Time Dependent</a>         |

## Dependent Variables 2 (v2)

### GENERAL

| Description           | Value                          |
|-----------------------|--------------------------------|
| Defined by study step | <a href="#">Time Dependent</a> |

### INITIAL VALUES OF VARIABLES SOLVED FOR

| Description | Value                      |
|-------------|----------------------------|
| Method      | Solution                   |
| Solution    | <a href="#">Solution 2</a> |

### RESIDUAL SCALING

| Description | Value  |
|-------------|--------|
| Method      | Manual |

### VALUES OF VARIABLES NOT SOLVED FOR

| Description | Value                      |
|-------------|----------------------------|
| Method      | Solution                   |
| Solution    | <a href="#">Solution 2</a> |

### INITIAL VALUE CALCULATION CONSTANTS

| Constant name | Initial value source                                       |
|---------------|------------------------------------------------------------|
| t             | range(0, sampling_time, 2*Segment_Duration+Start_Duration) |
| timestep      | 1.3E-6[s]                                                  |

## Concentration (comp1.cAnion) (comp1\_cAnion)

### GENERAL

| Description        | Value                                                             |
|--------------------|-------------------------------------------------------------------|
| Field components   | comp1.cAnion                                                      |
| Internal variables | {comp1.uflux.cAnion, comp1.dflux.cAnion, comp1.tds.dt2Inv_cAnion} |

## Concentration (comp1.cCation) (comp1\_cCation)

### GENERAL

| Description        | Value                                                                |
|--------------------|----------------------------------------------------------------------|
| Field components   | comp1.cCation                                                        |
| Internal variables | {comp1.uflux.cCation, comp1.dflux.cCation, comp1.tds.dt2Inv_cCation} |

**Concentration (comp1.cOx) (comp1\_cOx)**

GENERAL

| Description        | Value                                                     |
|--------------------|-----------------------------------------------------------|
| Field components   | comp1.cOx                                                 |
| Internal variables | {comp1.uflux.cOx, comp1.dflux.cOx, comp1.tds2.dt2Inv_cOx} |

**Concentration (comp1.cRed) (comp1\_cRed)**

GENERAL

| Description        | Value                                                        |
|--------------------|--------------------------------------------------------------|
| Field components   | comp1.cRed                                                   |
| Internal variables | {comp1.uflux.cRed, comp1.dflux.cRed, comp1.tds2.dt2Inv_cRed} |

**Electric potential (comp1.Phi) (comp1\_Phi)**

GENERAL

| Description      | Value     |
|------------------|-----------|
| Field components | comp1.Phi |

**Ohmic drop as determined by 'gain circuit' (comp2.ODE1) (comp2\_ODE1)**

GENERAL

| Description      | Value    |
|------------------|----------|
| State components | comp2.IR |

**Time-Dependent Solver 1 (t1)**

TIME STEPPING

| Description           | Value  |
|-----------------------|--------|
| Steps taken by solver | Strict |
| Initial step          | 1E-9   |
| Maximum BDF order     | 2      |
| Nonlinear controller  | On     |

**Advanced (aDef)**

ASSEMBLY SETTINGS

| Description            | Value |
|------------------------|-------|
| Reuse sparsity pattern | On    |

**Fully Coupled 1 (fc1)**

GENERAL

| Description   | Value                    |
|---------------|--------------------------|
| Linear solver | <a href="#">Direct 1</a> |

#### METHOD AND TERMINATION

| Description                      | Value              |
|----------------------------------|--------------------|
| Nonlinear method                 | Automatic (Newton) |
| Restriction for step-size update | 5                  |
| Maximum number of iterations     | 100                |

#### Direct 1 (d1)

##### GENERAL

| Description           | Value   |
|-----------------------|---------|
| Solver                | PARDISO |
| Pivoting perturbation | 1.0E-13 |

#### 4.4.2 Parametric Solutions 1

**z\_Red\_diff=2, z\_Ox\_diff=3, OhmicDropCompensation=0.95 (su1)**

##### GENERAL

| Description | Value                                                 |
|-------------|-------------------------------------------------------|
| Solution    | z_Red_diff=2, z_Ox_diff=3, OhmicDropCompensation=0.95 |

## 5 Results

### 5.1 PLOT GROUPS

#### 5.1.1 Current Density

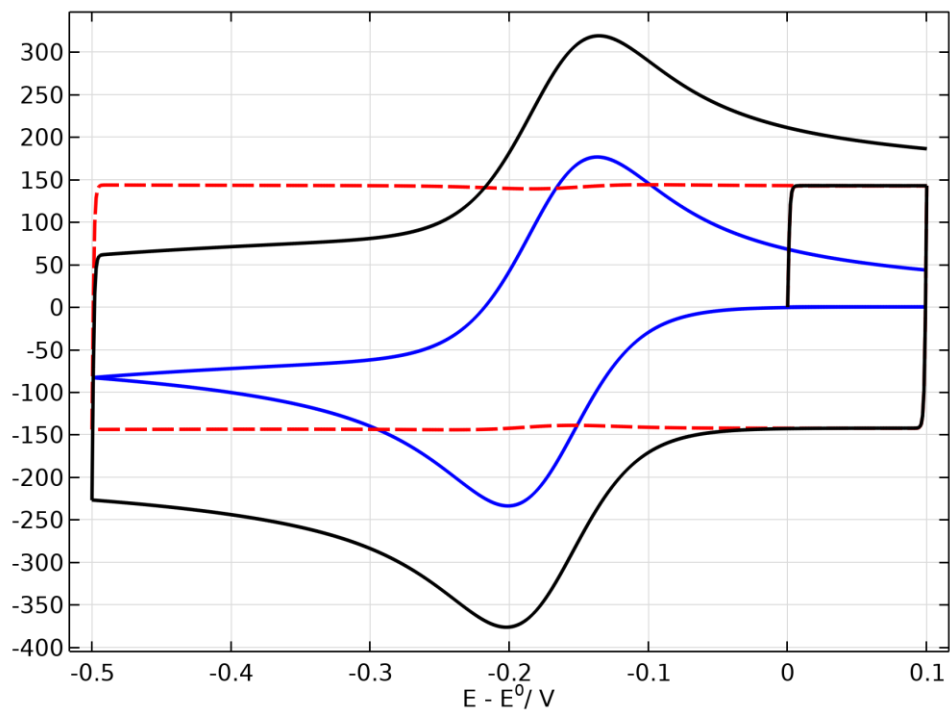

### 5.1.2 Surface Species Concentration - Time Dependent

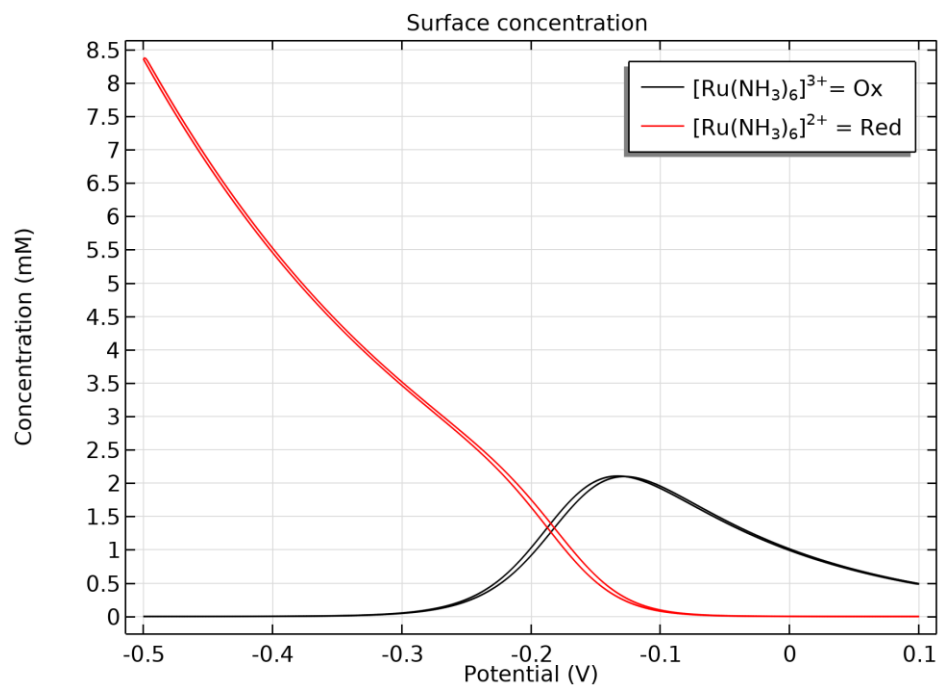

Surface concentration

### 5.1.3 Applied potential vs time (corrected & uncorrected)

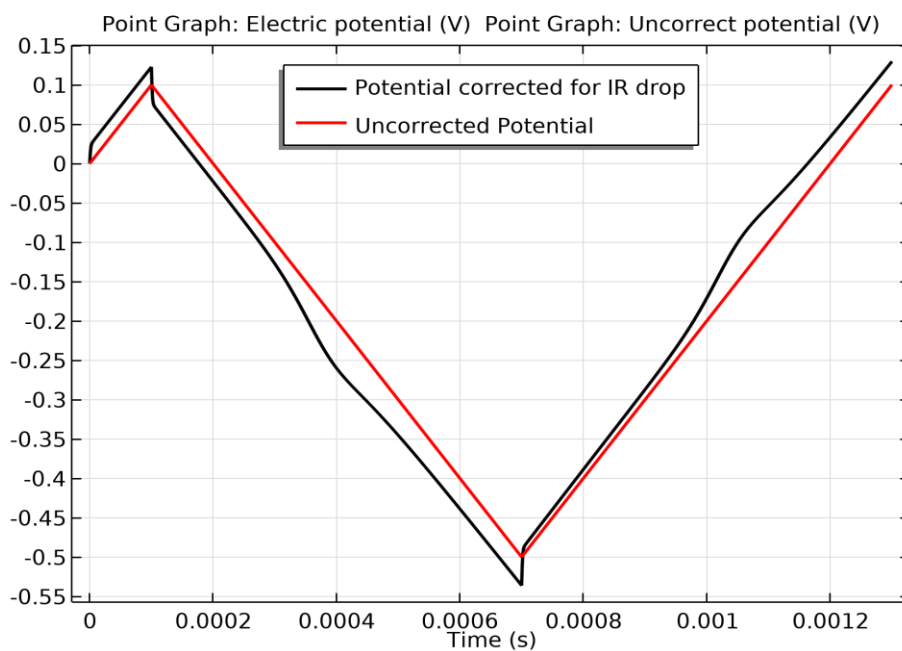

Point Graph: Electric potential (V) Point Graph: Uncorrected potential (V)

### 5.1.4 Electric Potential across Solution - Time Dependent

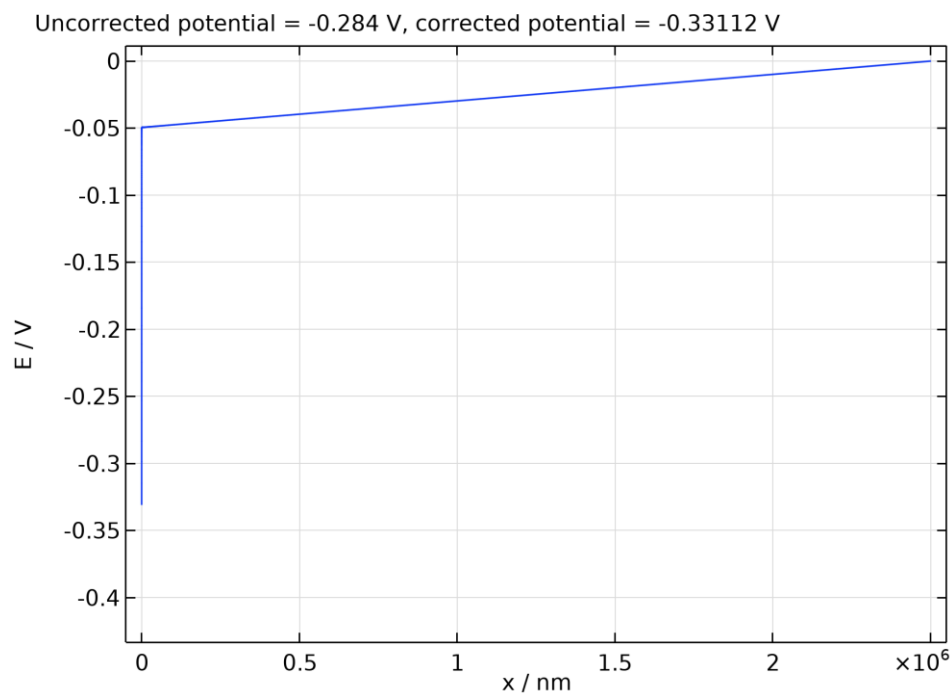

### 5.1.5 Probe Plot (current components vs time)

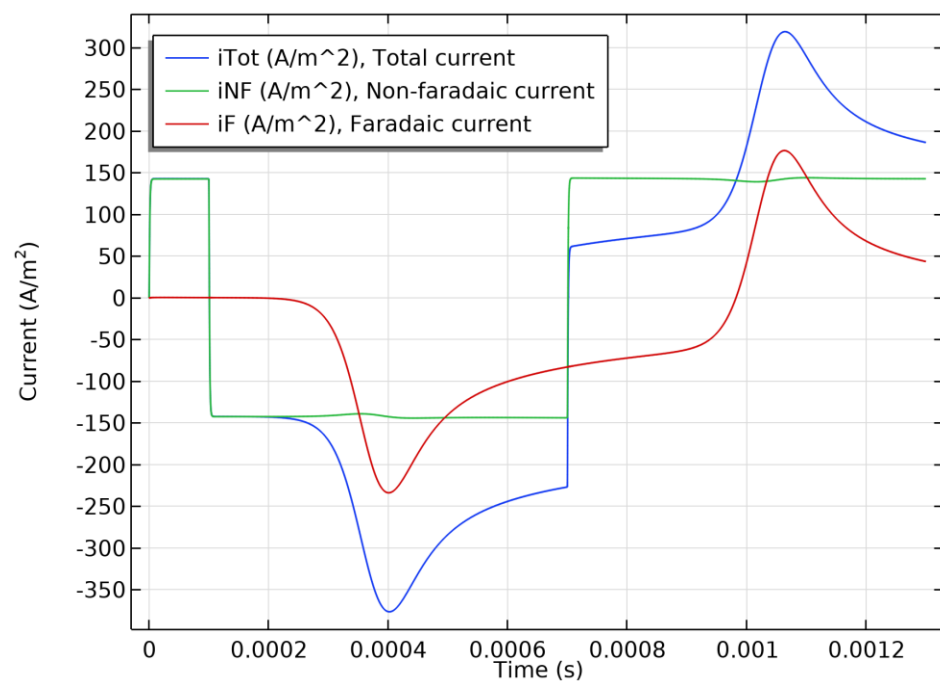

### 5.1.6 IR drop

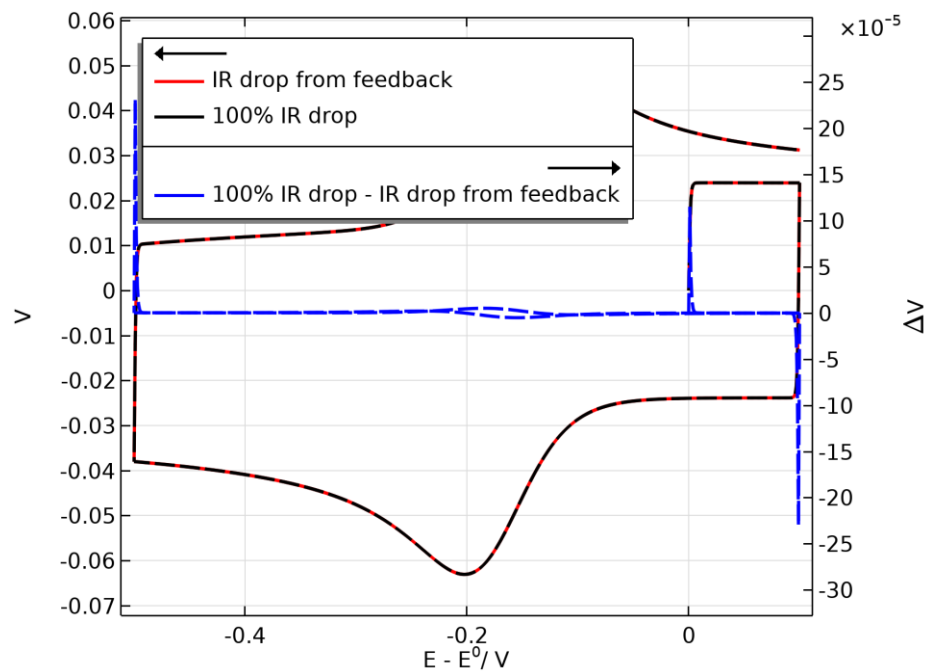

### 5.1.7 Probe (potentials vs time)

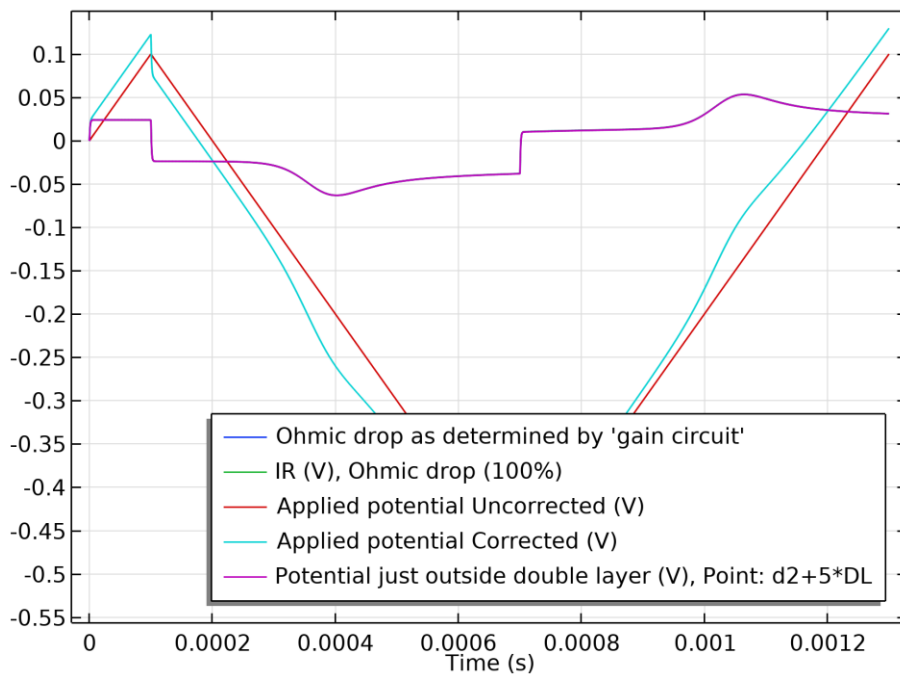

### 5.1.8 Probe - potential at positions

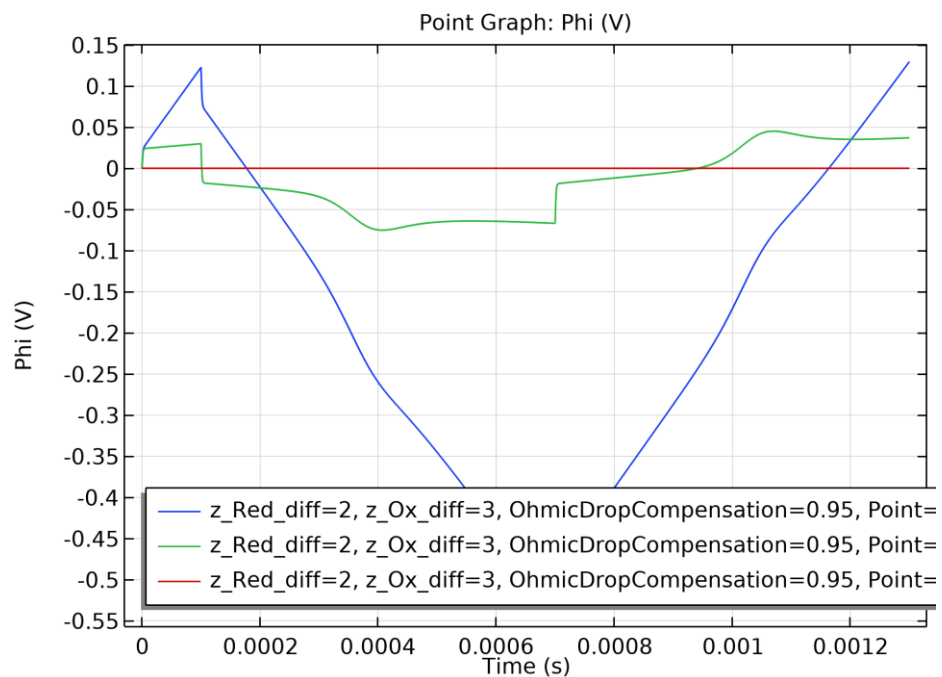

Point Graph: Phi (V)

### 5.1.9 Scan rate ( $dE_{corr}/dt$ )

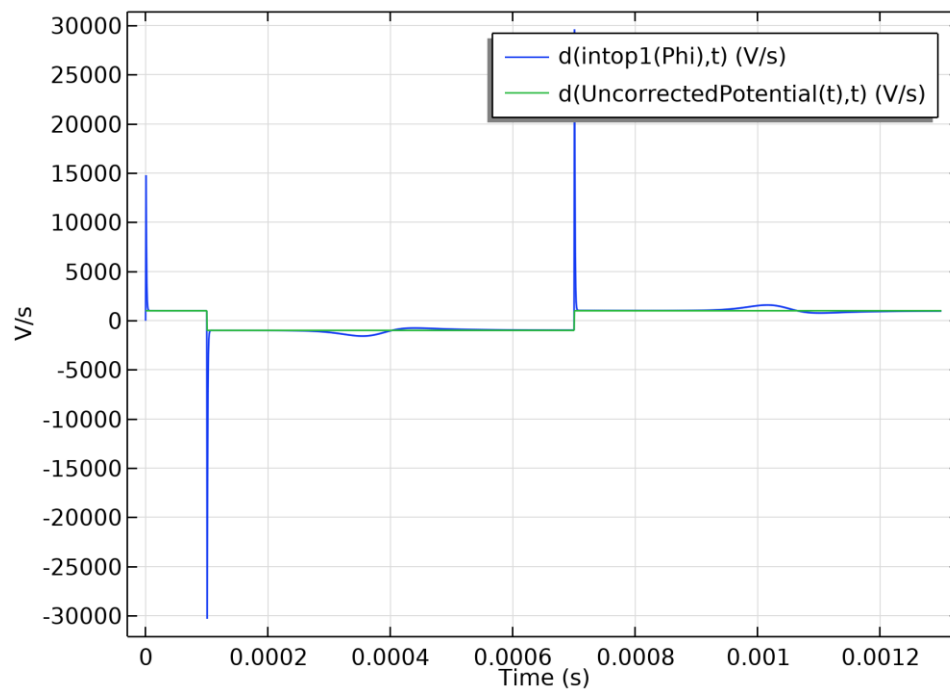

Supplement: d3cp00098b3.pdf [file d3cp00098b3.pdf]
